# Supplementary material for: New Thiodiketopiperazine and 3,4-Dihydroisocoumarin Derivatives from the Marine-Derived Fungus Aspergillus terreus
Source: MDPI journal article supplement (doi:10.3390/md18030132), 2020-02-26
Supplement: s1 [file s1]

# New Thiodiketopiperazine and 3,4-Dihydroisocoumarin Derivatives from the Marine-derived Fungus *Aspergillus terreus*

Jing-Shuai Wu<sup>1,2</sup>, Xiao-Hui Shi<sup>1,2</sup>, Guang-Shan Yao<sup>1,2,3</sup>, Chang-Lun Shao<sup>1,2</sup>, Xiu-Mei Fu<sup>1,2</sup>,  
Xiu-Li Zhang<sup>1,2</sup>, Hua-Shi Guan<sup>1,2,\*</sup> and Chang-Yun Wang<sup>1,2,\*</sup>

<sup>1</sup> Key Laboratory of Marine Drugs, The Ministry of Education of China, School of Medicine and Pharmacy; Institute of Evolution & Marine Biodiversity, Ocean University of China, Qingdao 266003, China; wujingshuai0110@sina.cn (J.-S.W.); 13061461893@163.com (X.-H.S.); ygshan@126.com (G.-S.Y.); shaochangelun@163.com (C.-L.S.); fuxiumei92@163.com (X.-M.F.); xiulizhang@ouc.edu.cn (X.-L.Z.)

<sup>2</sup> Laboratory for Marine Drugs and Bioproducts, Qingdao National Laboratory for Marine Science and Technology, Qingdao 266237, China

<sup>3</sup> Institute of Oceanography, Minjiang University, Fuzhou 350108, China

\* Correspondence: hsguan@ouc.edu.cn (H.-S.G.); changyun@ouc.edu.cn (C.-Y.W.);  
Tel.: +86-53282031667 (H.-S.G.); +86-53282031536 (C.-Y.W.)

## List of supporting information

**Figure S1.** *Aspergillus terreus* RA2905 and its phylogenetic tree of ITS gene

**Figure S2.**  $^1\text{H}$  NMR (500 MHz,  $\text{DMSO-}d_6$ ) spectrum of compound **1**

**Figure S3.** Partial  $^1\text{H}$  NMR (500 MHz,  $\text{DMSO-}d_6$ ) spectrum of compound **1**

**Figure S4.**  $^{13}\text{C}$  NMR (125 MHz,  $\text{DMSO-}d_6$ ) spectrum of compound **1**

**Figure S5.** HSQC ( $\text{DMSO-}d_6$ ) spectrum of compound **1**

**Figure S6.**  $^1\text{H}$ – $^1\text{H}$  COSY ( $\text{DMSO-}d_6$ ) spectrum of compound **1**

**Figure S7.** HMBC ( $\text{DMSO-}d_6$ ) spectrum of compound **1**

**Figure S8.** NOE ( $\text{DMSO-}d_6$ ) spectrum of compound **1**

**Figure S9.** HRESIMS spectrum of compound **1**

**Figure S10.** ESIMS spectrum of compound **1**

**Figure S11.**  $^1\text{H}$  NMR (500 MHz,  $\text{DMSO-}d_6$ ) spectrum of compound **2**

**Figure S12.** Partial  $^1\text{H}$  NMR (500 MHz,  $\text{DMSO-}d_6$ ) spectrum of compound **2**

**Figure S13.**  $^{13}\text{C}$  NMR (125 MHz,  $\text{DMSO-}d_6$ ) spectrum of compound **2**

**Figure S14.** HSQC ( $\text{DMSO-}d_6$ ) spectrum of compound **2**

**Figure S15.**  $^1\text{H}$ – $^1\text{H}$  COSY ( $\text{DMSO-}d_6$ ) spectrum of compound **2**

**Figure S16.** HMBC ( $\text{DMSO-}d_6$ ) spectrum of compound **2**

**Figure S17.** NOE ( $\text{DMSO-}d_6$ ) spectrum of compound **2**

**Figure S18.** HRESIMS spectrum of compound **2**

**Figure S19.** ESIMS spectrum of compound **2**

**Figure S20.**  $^1\text{H}$  NMR (500 MHz,  $\text{DMSO-}d_6$ ) spectrum of compound **3**

**Figure S21.** Partial  $^1\text{H}$  NMR (500 MHz,  $\text{DMSO-}d_6$ ) spectrum of compound **3**

**Figure S22.**  $^{13}\text{C}$  NMR (125 MHz,  $\text{DMSO-}d_6$ ) spectrum of compound **3**

**Figure S23.** HSQC ( $\text{DMSO-}d_6$ ) spectrum of compound **3**

**Figure S24.**  $^1\text{H}$ – $^1\text{H}$  COSY ( $\text{DMSO-}d_6$ ) spectrum of compound **3**

**Figure S25.** HMBC ( $\text{DMSO-}d_6$ ) spectrum of compound **3**

**Figure S26.** HRESIMS spectrum of compound **3**

**Figure S27.** ESIMS spectrum of compound **3**

**Figure S28.**  $^1\text{H}$  NMR (500 MHz,  $\text{DMSO-}d_6$ ) spectrum of compound **8**

**Figure S29.**  $^{13}\text{C}$  NMR (125 MHz,  $\text{DMSO-}d_6$ ) spectrum of compound **8**

**Figure S30.** HSQC (DMSO-*d*<sub>6</sub>) spectrum of compound **8**

**Figure S31.** <sup>1</sup>H–<sup>1</sup>H COSY (DMSO-*d*<sub>6</sub>) spectrum of compound **8**

**Figure S32.** HMBC (DMSO-*d*<sub>6</sub>) spectrum of compound **8**

**Figure S33.** HRESIMS spectrum of compound **8**

**Figure S34.** <sup>1</sup>H NMR (500 MHz, DMSO-*d*<sub>6</sub>) spectrum of compound **9**

**Figure S35.** <sup>13</sup>C NMR (125 MHz, DMSO-*d*<sub>6</sub>) spectrum of compound **9**

**Figure S36.** HSQC (DMSO-*d*<sub>6</sub>) spectrum of compound **9**

**Figure S37.** <sup>1</sup>H–<sup>1</sup>H COSY (DMSO-*d*<sub>6</sub>) spectrum of compound **9**

**Figure S38.** HMBC (DMSO-*d*<sub>6</sub>) spectrum of compound **9**

**Figure S39.** HRESIMS spectrum of compound **9**

**Figure S40.** Key HMBC correlations of compound **3**

**Figure S41.** Crystal diagram of compound **6**

**Figure S42.** Key HMBC correlations of compounds **8** and **9**

**Figure S43.** The CD spectrum of compound **8**

**Figure S44.** The CD spectrum of compound **9**

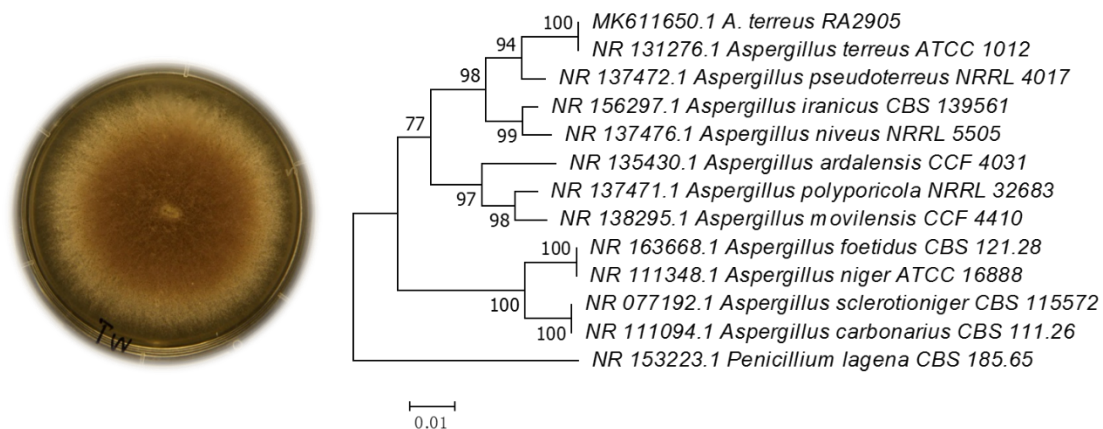

**Figure S1.** *Aspergillus terreus* RA2905 and its phylogenetic tree of ITS gene

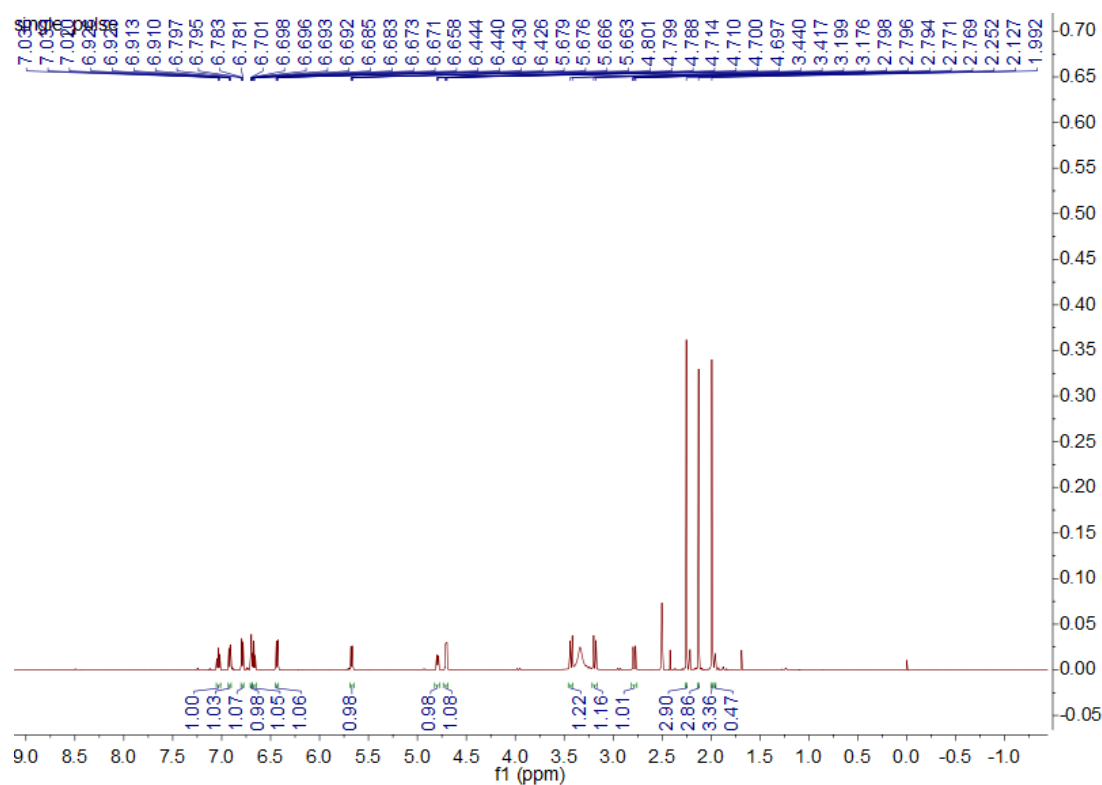

**Figure S2.** <sup>1</sup>H NMR (500 MHz, DMSO-*d*<sub>6</sub>) spectrum of compound 1

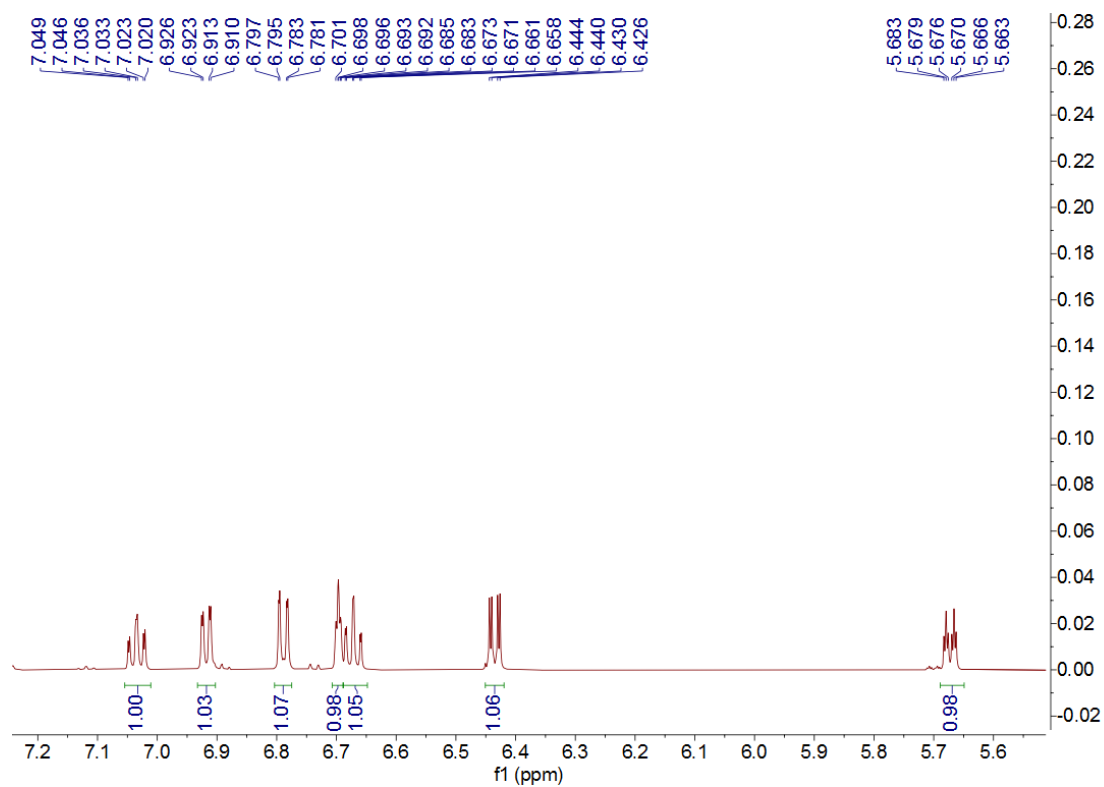

**Figure S3.** Partial  $^1\text{H}$  NMR (500 MHz,  $\text{DMSO}-d_6$ ) spectrum of compound **1**

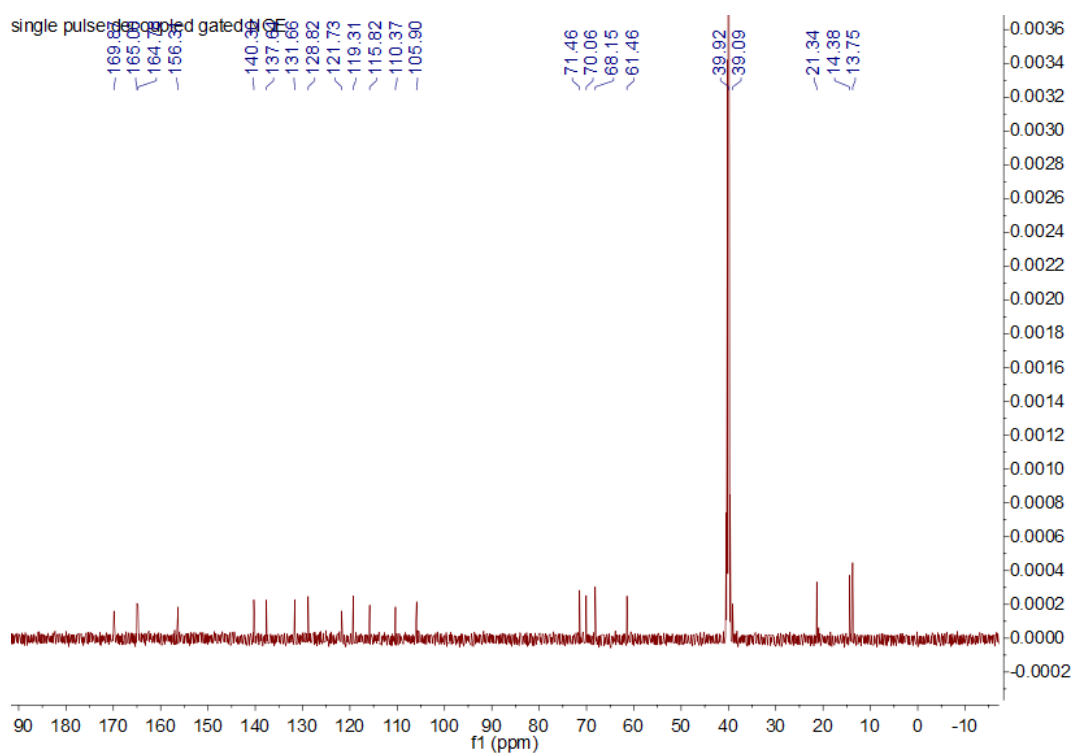

**Figure S4.**  $^{13}\text{C}$  NMR (125 MHz,  $\text{DMSO}-d_6$ ) spectrum of compound **1**

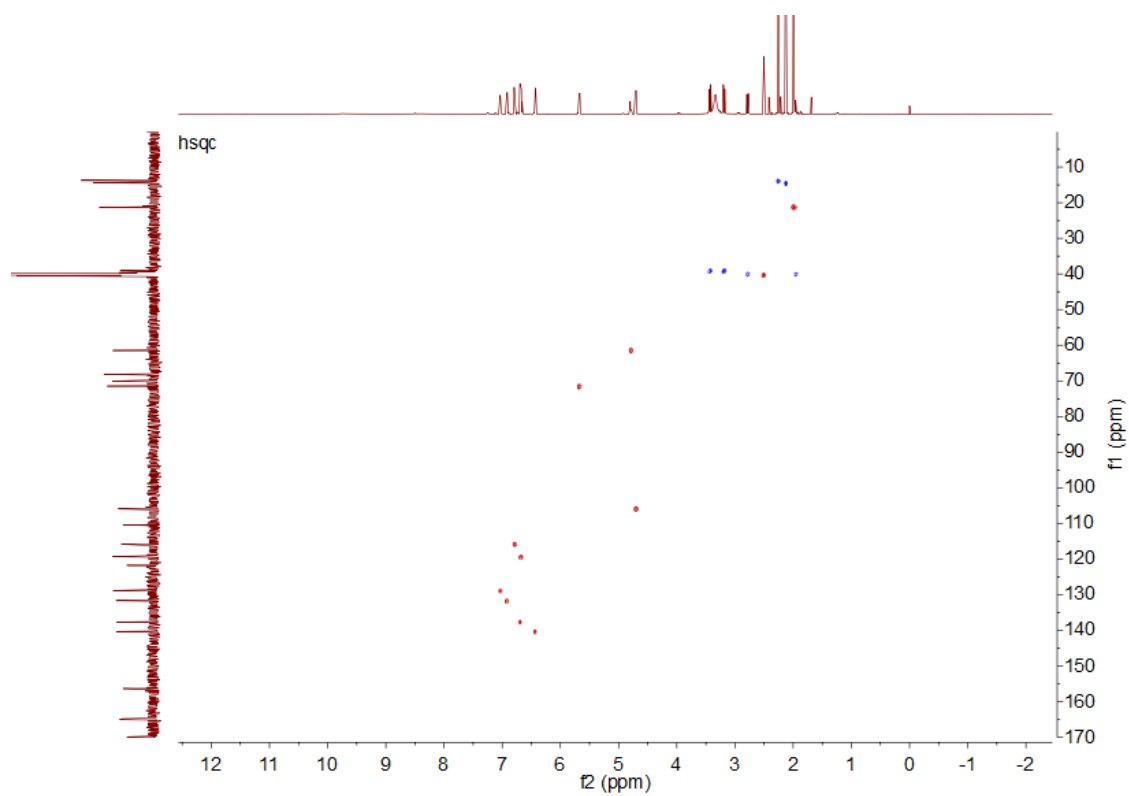

**Figure S5.** HSQC (DMSO- $d_6$ ) spectrum of compound **1**

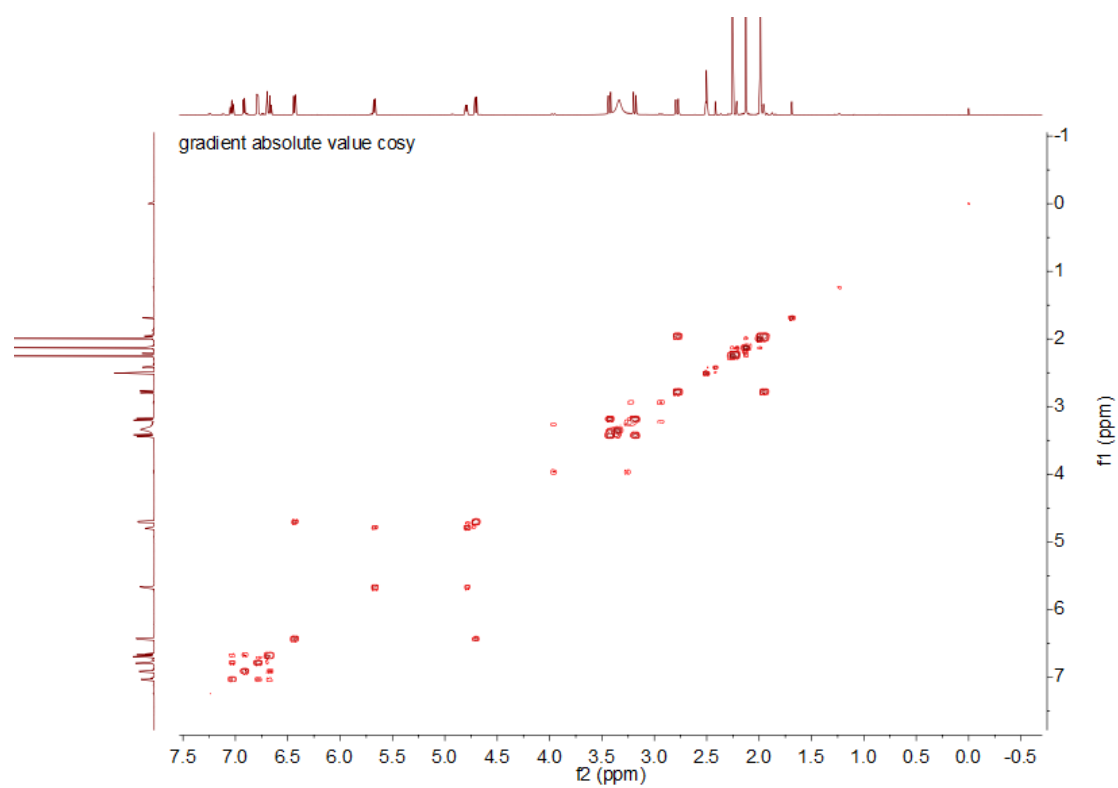

**Figure S6.**  $^1\text{H}$ - $^1\text{H}$  COSY (DMSO- $d_6$ ) spectrum of compound **1**

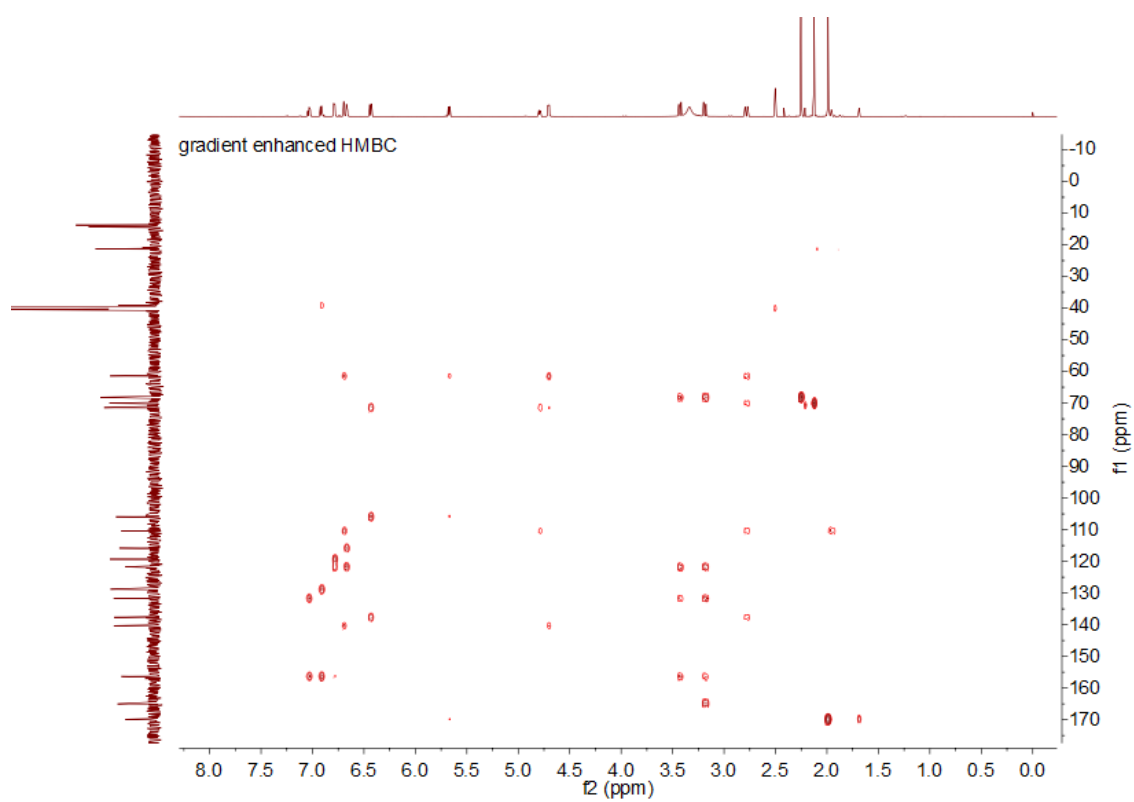

**Figure S7.** HMBC (DMSO- $d_6$ ) spectrum of compound **1**

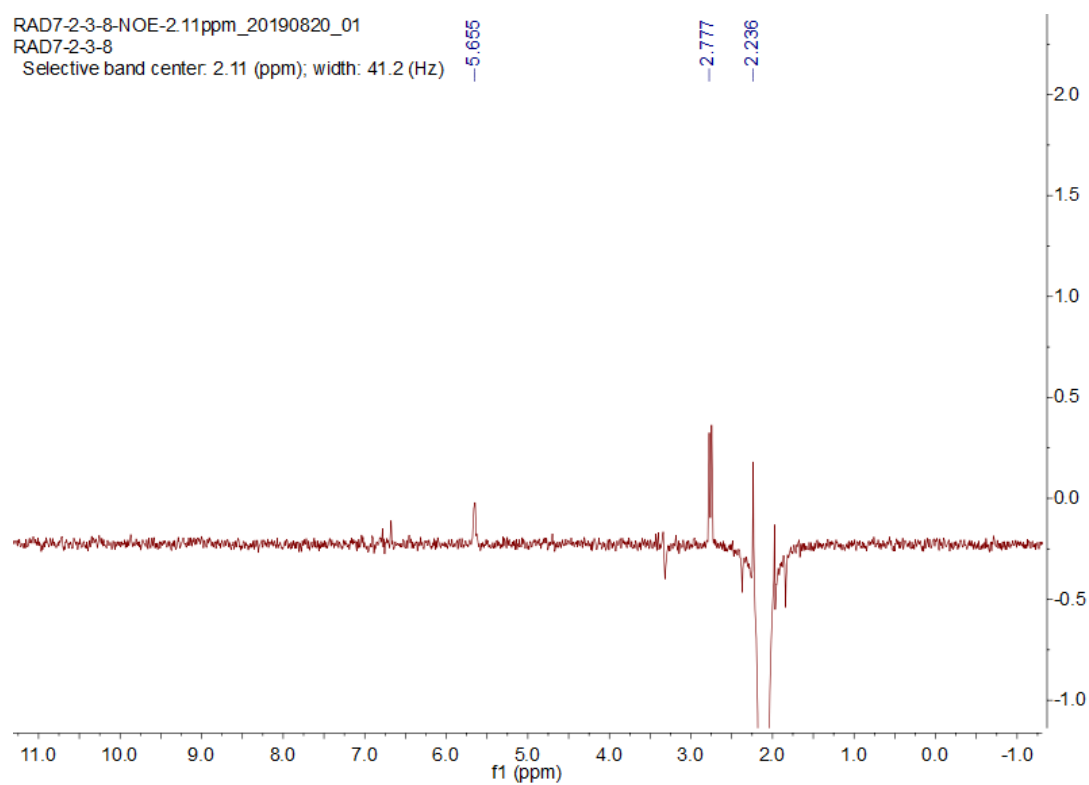

**Figure S8.** NOE (DMSO- $d_6$ ) spectrum of compound **1**

20190912-RAD7-2-3-8\_190912085157 #52 RT: 0.79 AV: 1 NL: 1.61E6  
T: FTMS - p ESI Full ms [100.00-2000.00]

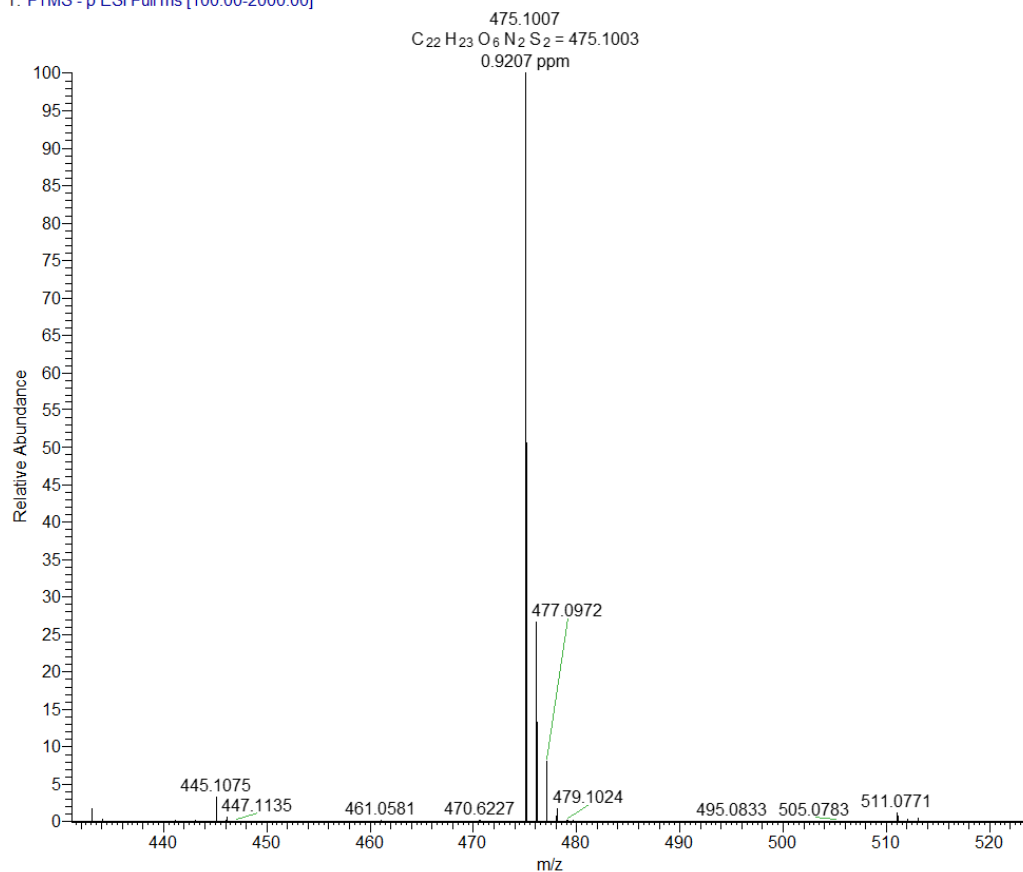

Figure S9. HRESIMS spectrum of compound 1

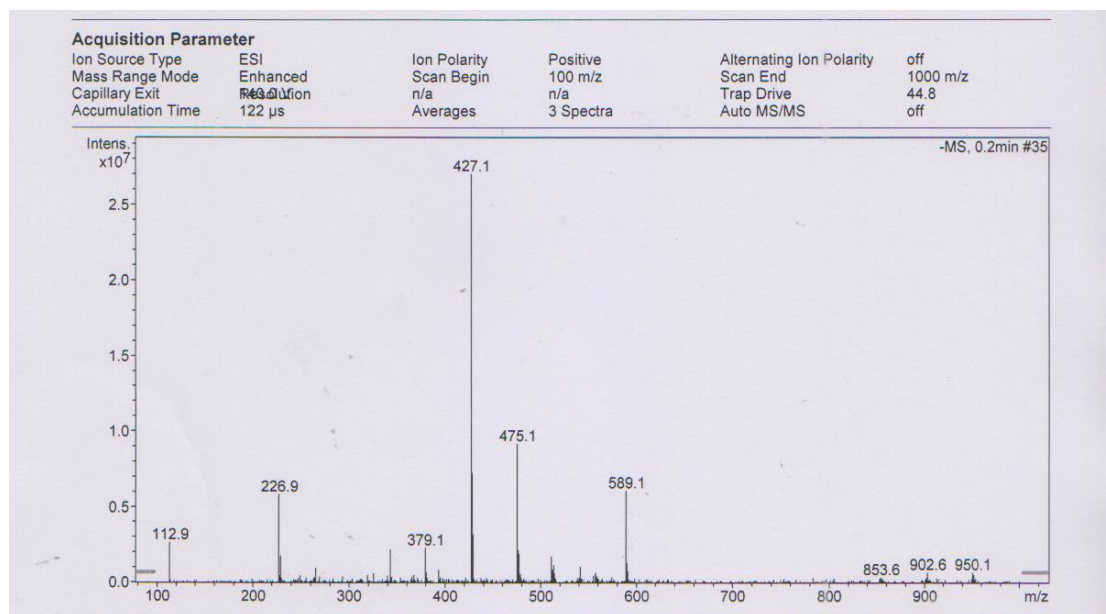

Figure S10. ESIMS spectrum of compound 1



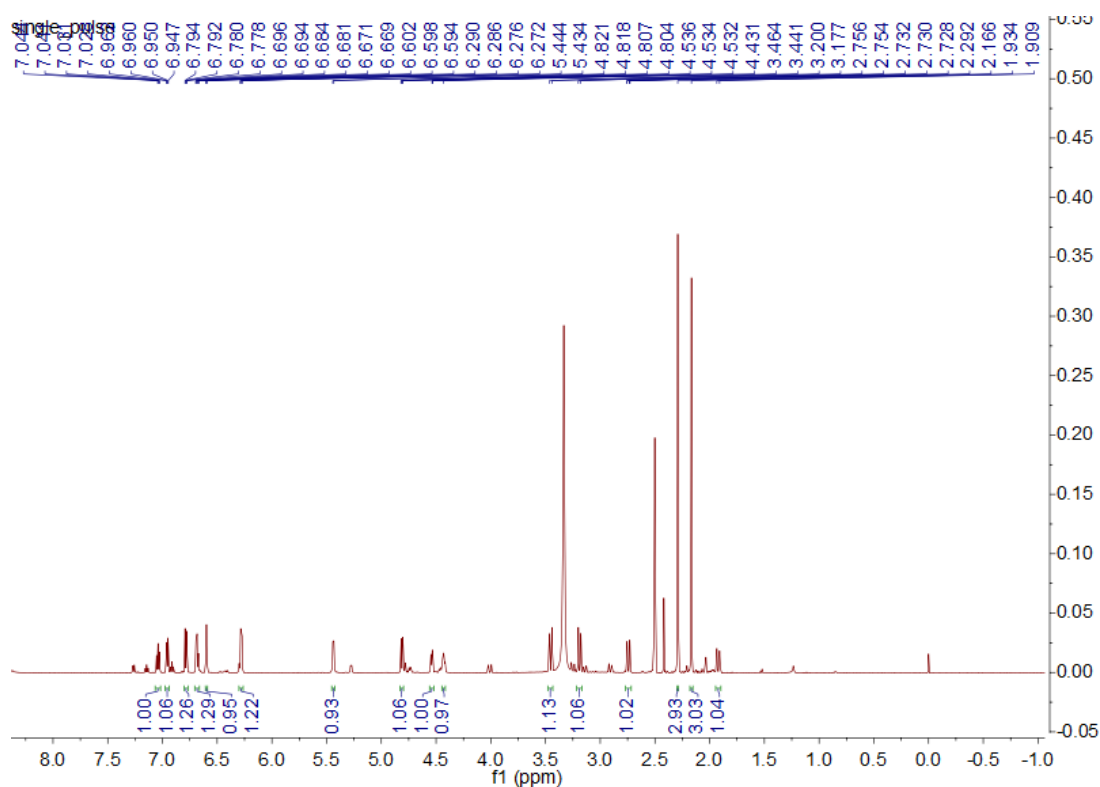

**Figure S11.**  $^1\text{H}$  NMR (500 MHz,  $\text{DMSO}-d_6$ ) spectrum of compound 2

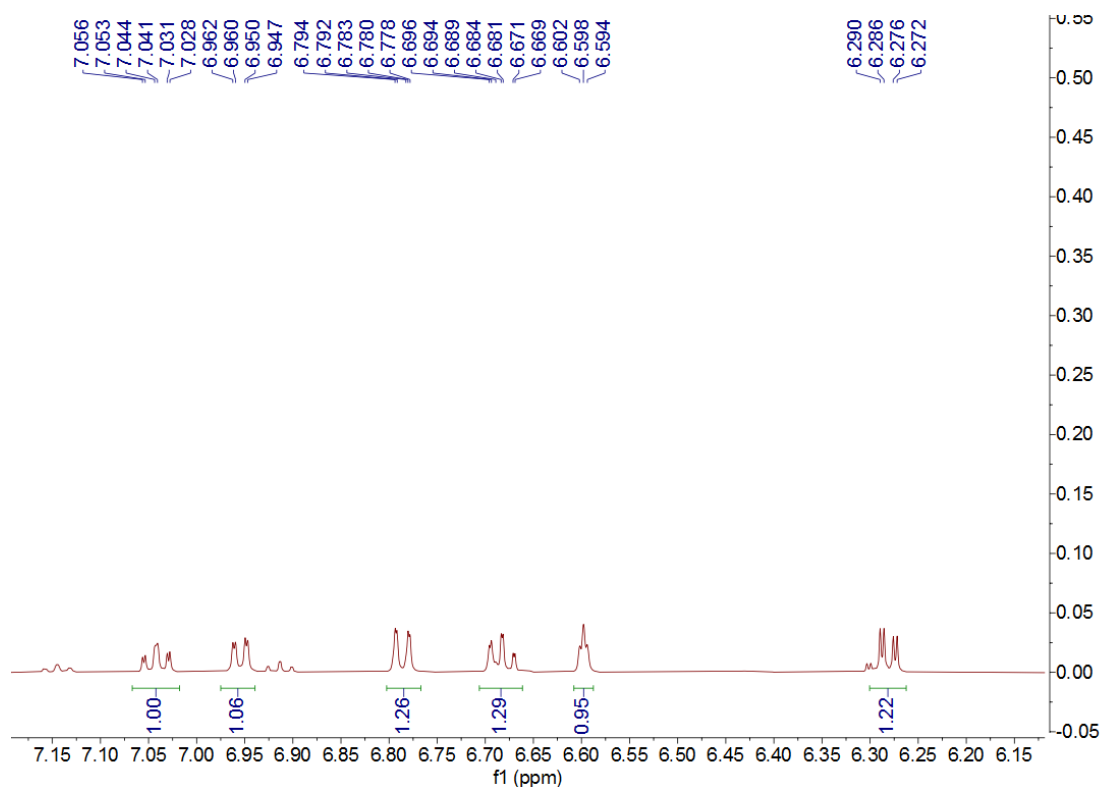

**Figure S12.** Partial  $^1\text{H}$  NMR (500 MHz,  $\text{DMSO}-d_6$ ) spectrum of compound 2

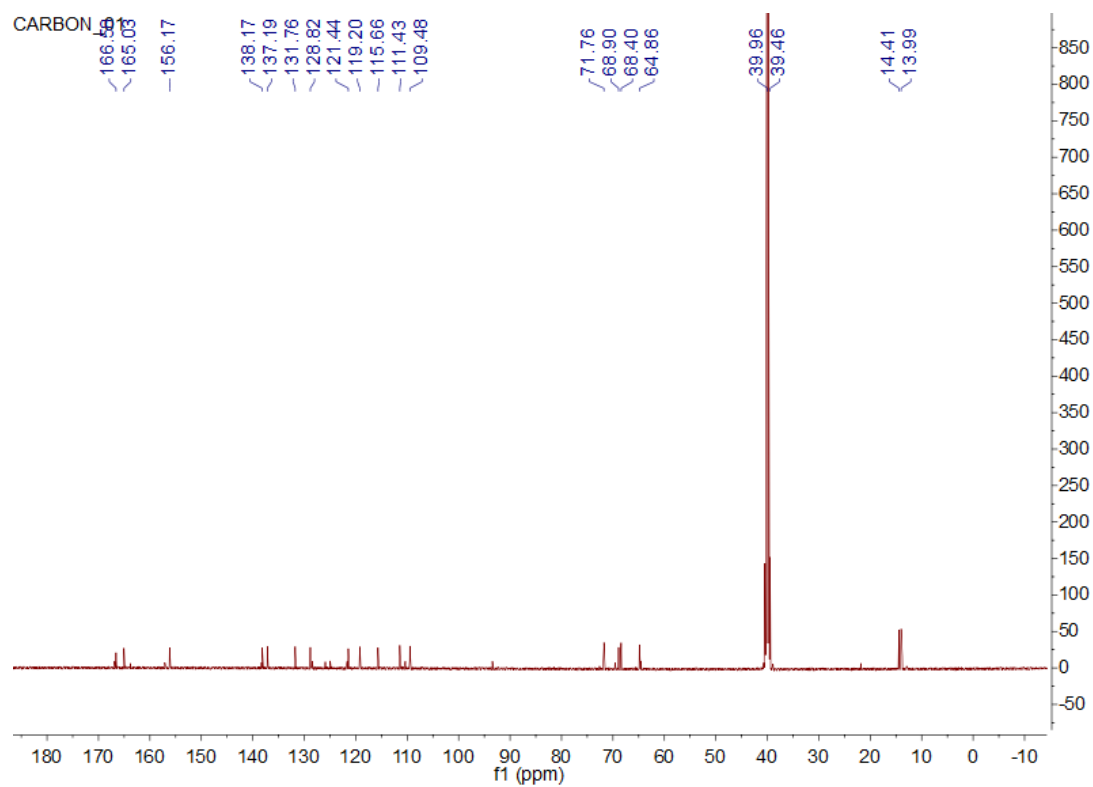

**Figure S13.**  $^{13}\text{C}$  NMR (125 MHz,  $\text{DMSO-}d_6$ ) spectrum of compound **2**

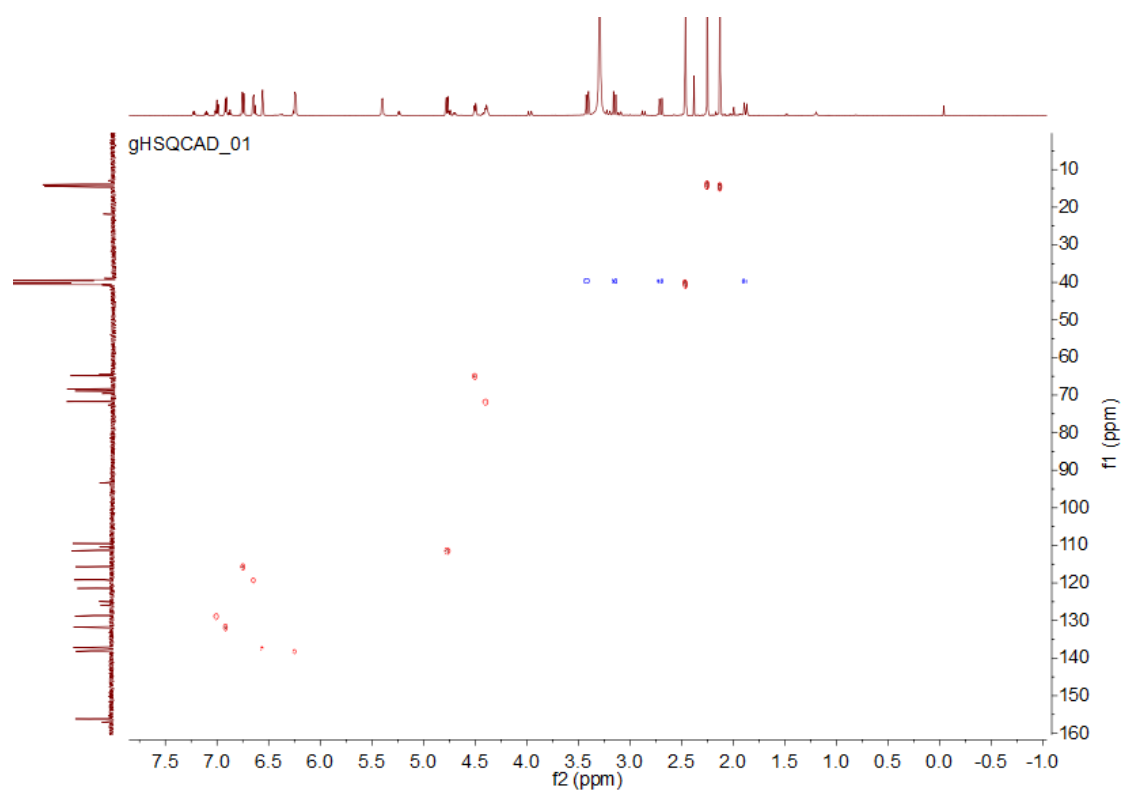

**Figure S14.** HSQC ( $\text{DMSO-}d_6$ ) spectrum of compound **2**

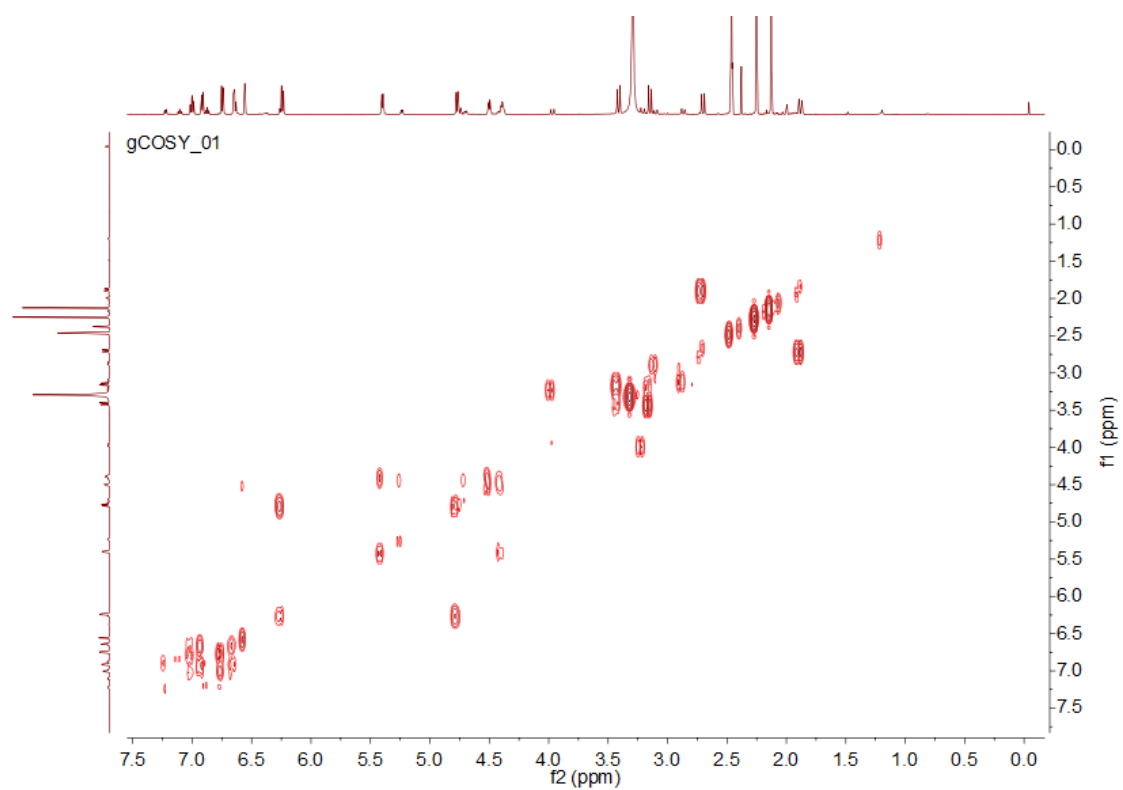

**Figure S15.**  $^1\text{H}$ - $^1\text{H}$  COSY (DMSO- $d_6$ ) spectrum of compound **2**

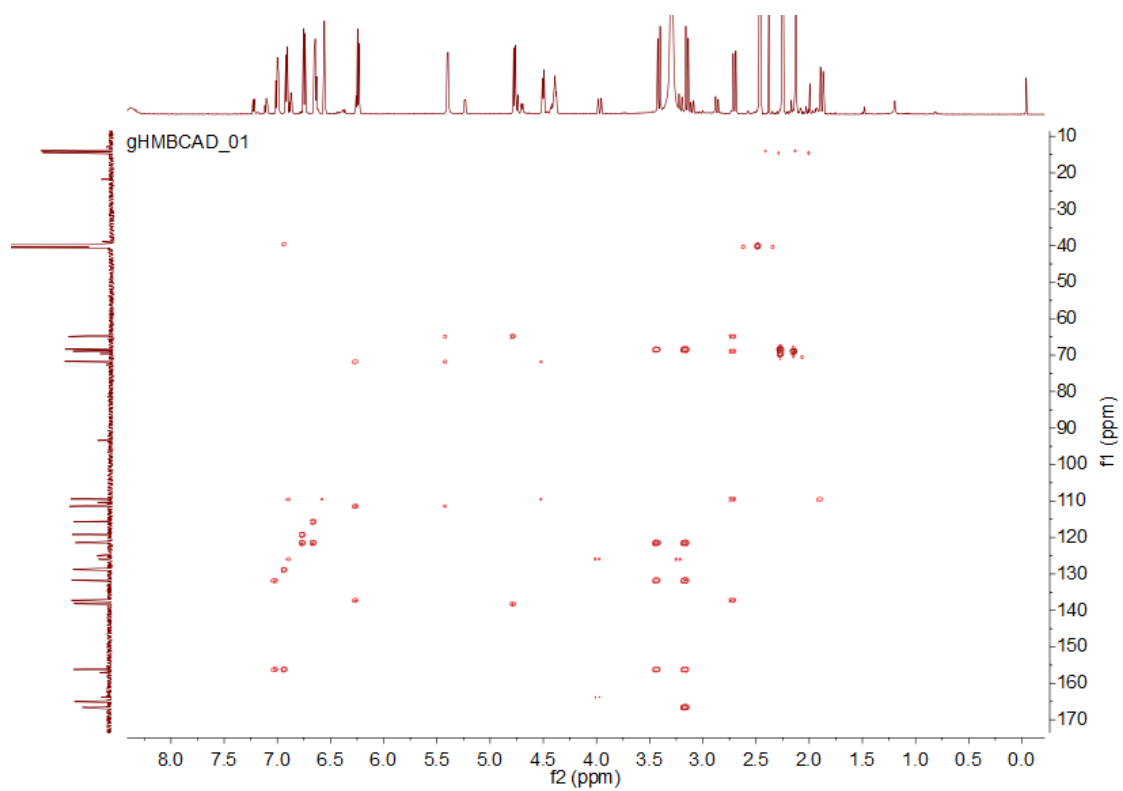

**Figure S16.** HMBC (DMSO- $d_6$ ) spectrum of compound **2**

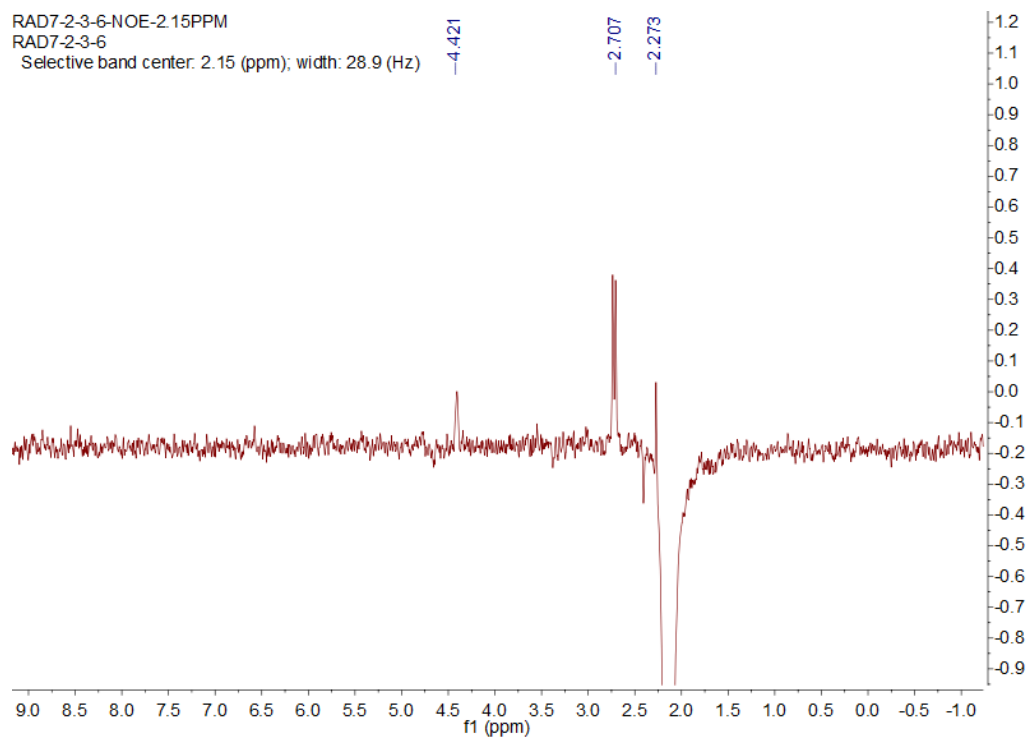

**Figure S17.** NOE (DMSO- $d_6$ ) spectrum of compound **2**

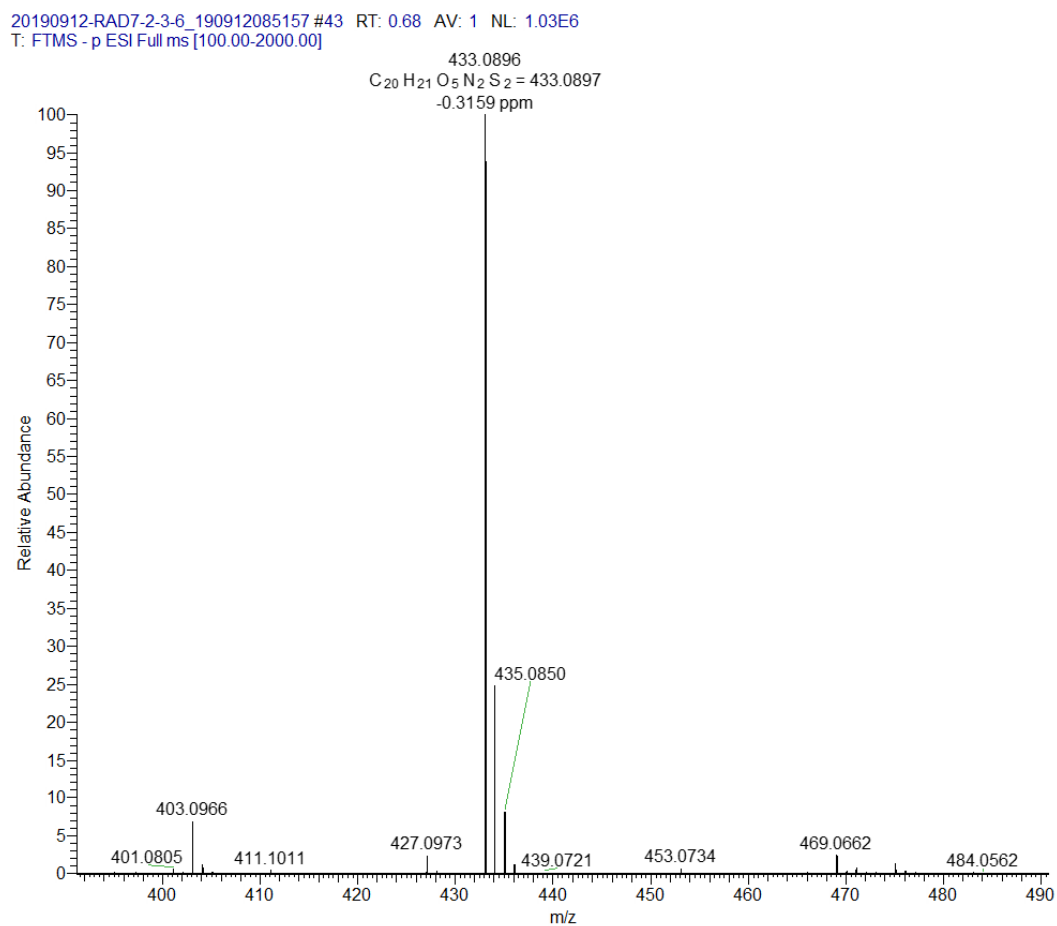

**Figure S18.** HRESIMS spectrum of compound **2**

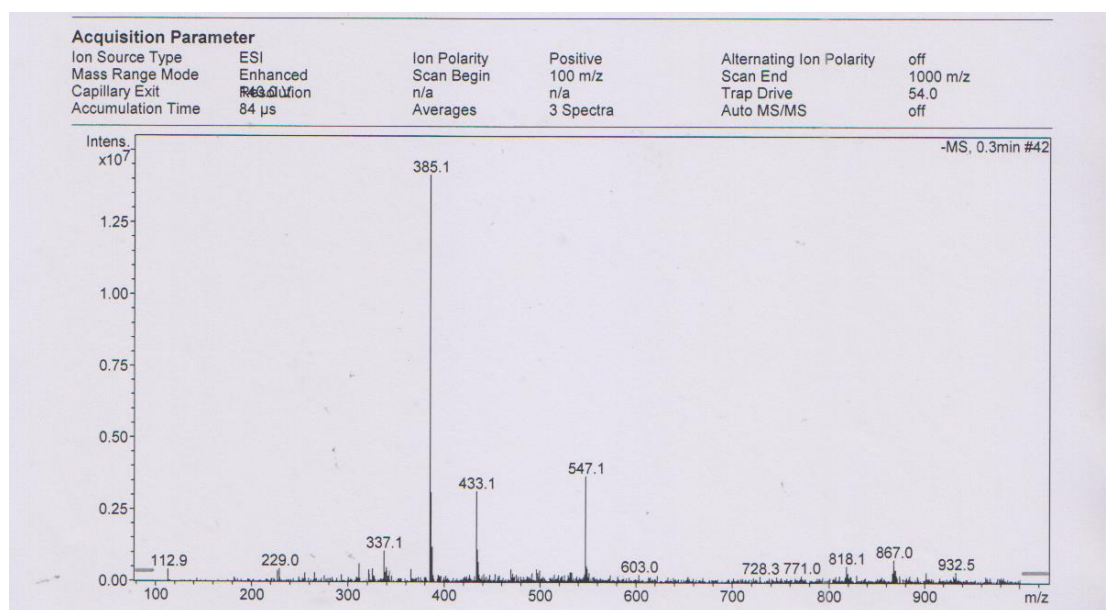

**Figure S19.** ESIMS spectrum of compound 2

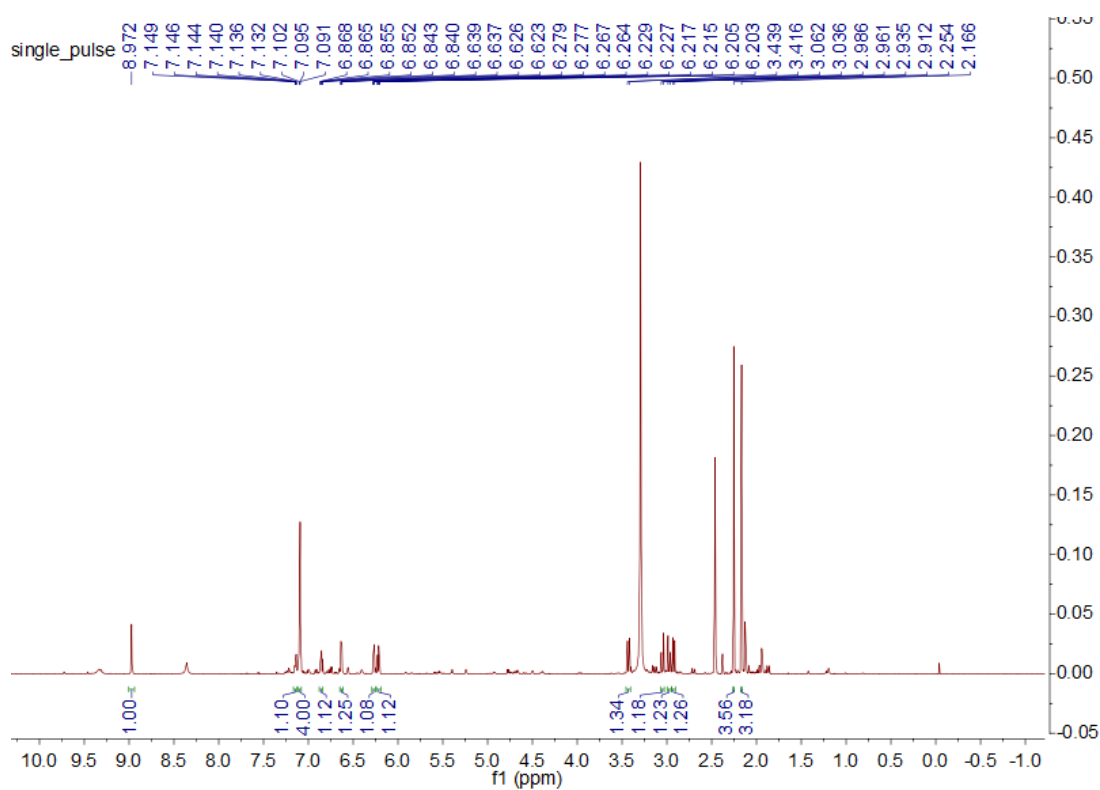

**Figure S20.** <sup>1</sup>H NMR (500 MHz, DMSO-*d*<sub>6</sub>) spectrum of compound 3

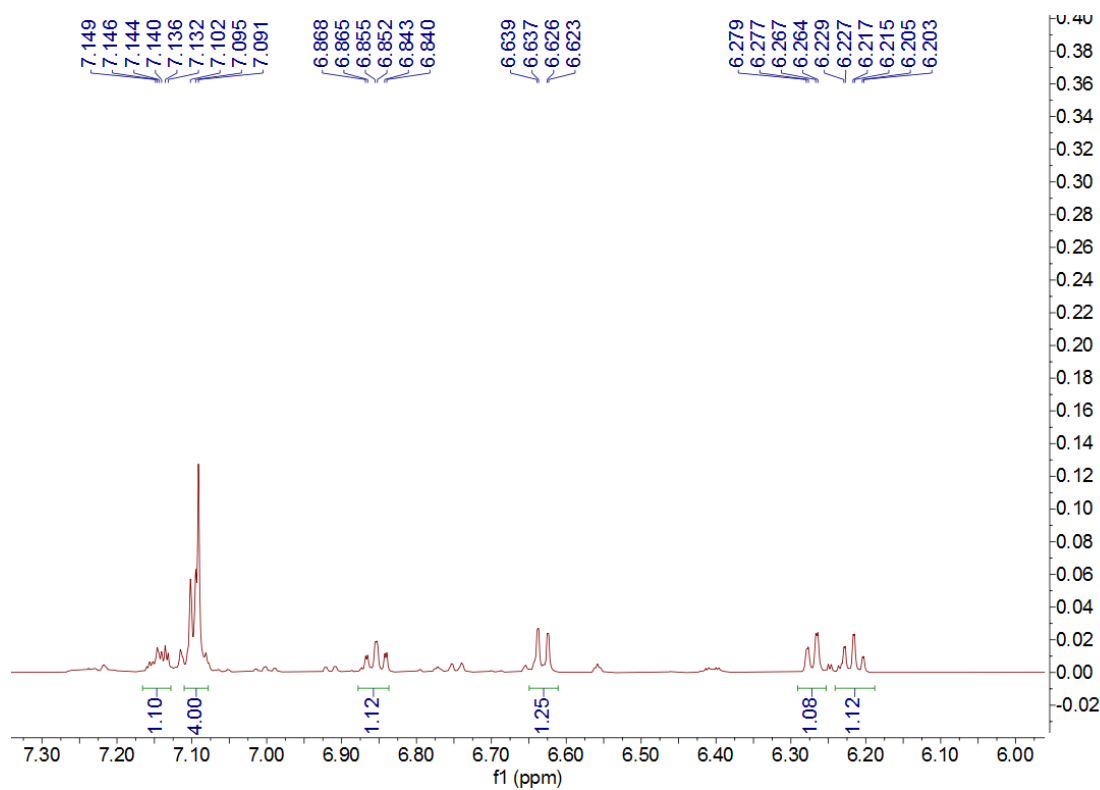

**Figure S21.** Partial  $^1\text{H}$  NMR (500 MHz,  $\text{DMSO-}d_6$ ) spectrum of compound **3**

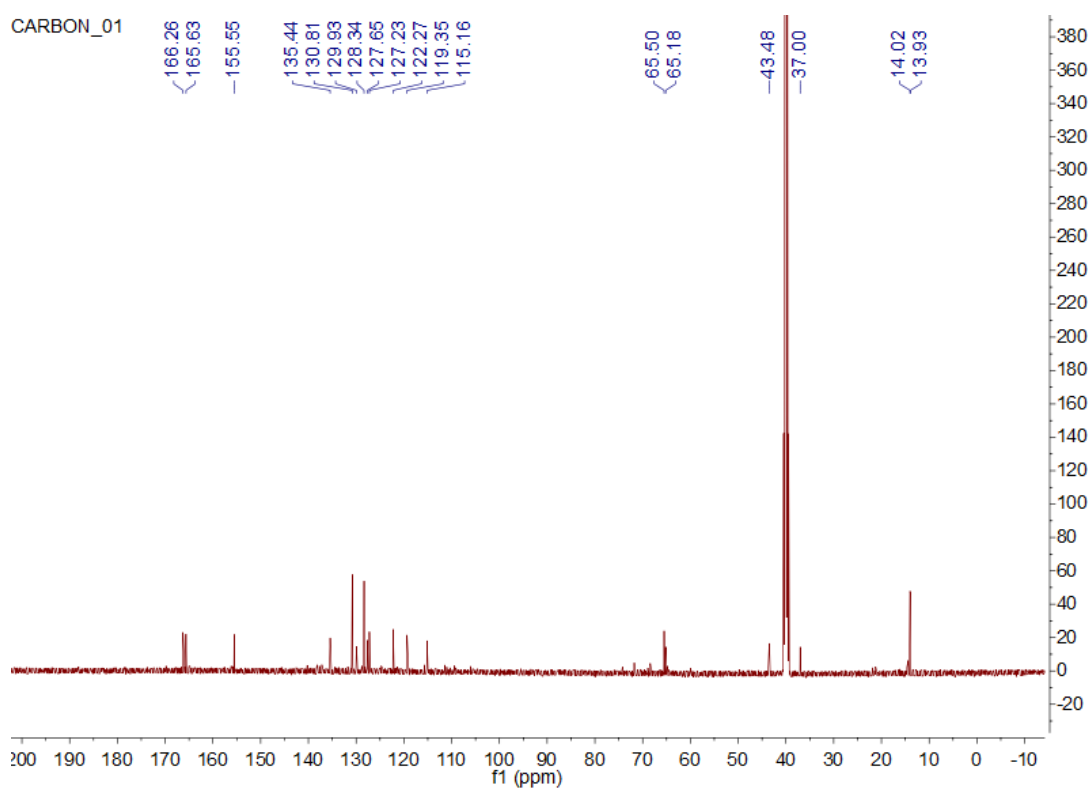

**Figure S22.**  $^{13}\text{C}$  NMR (125 MHz,  $\text{DMSO-}d_6$ ) spectrum of compound **3**

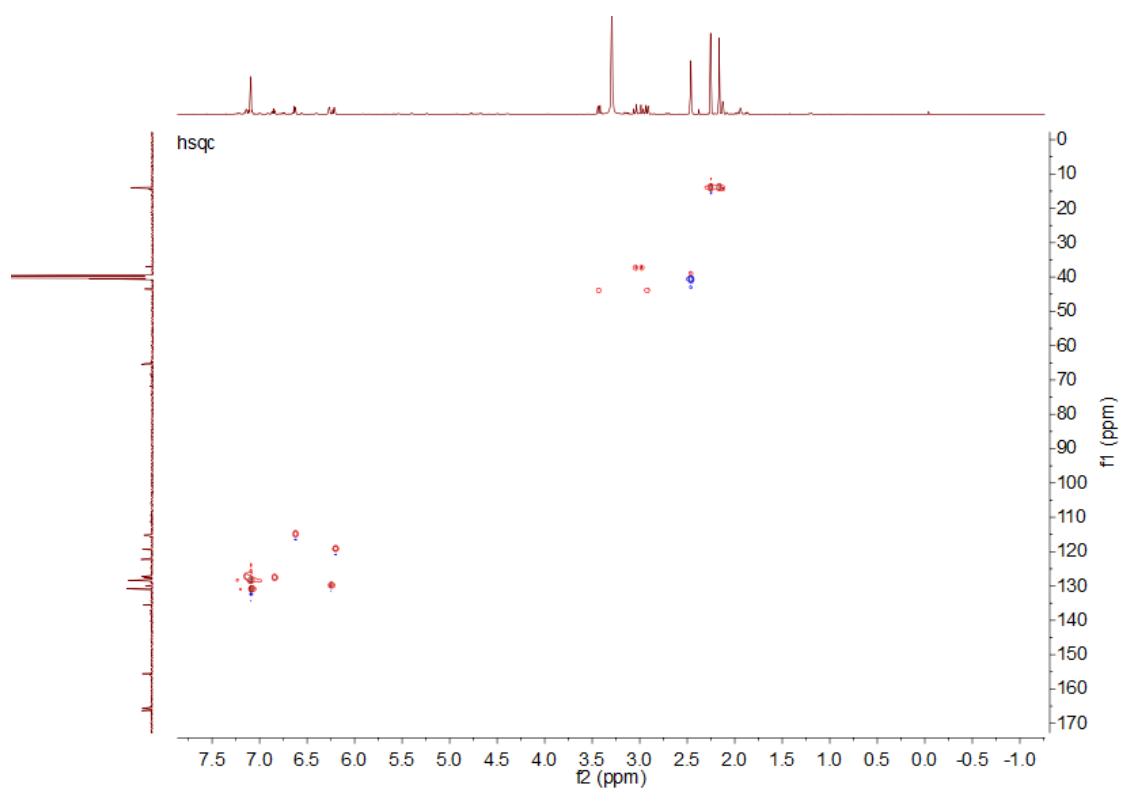

**Figure S23.** HSQC (DMSO- $d_6$ ) spectrum of compound **3**

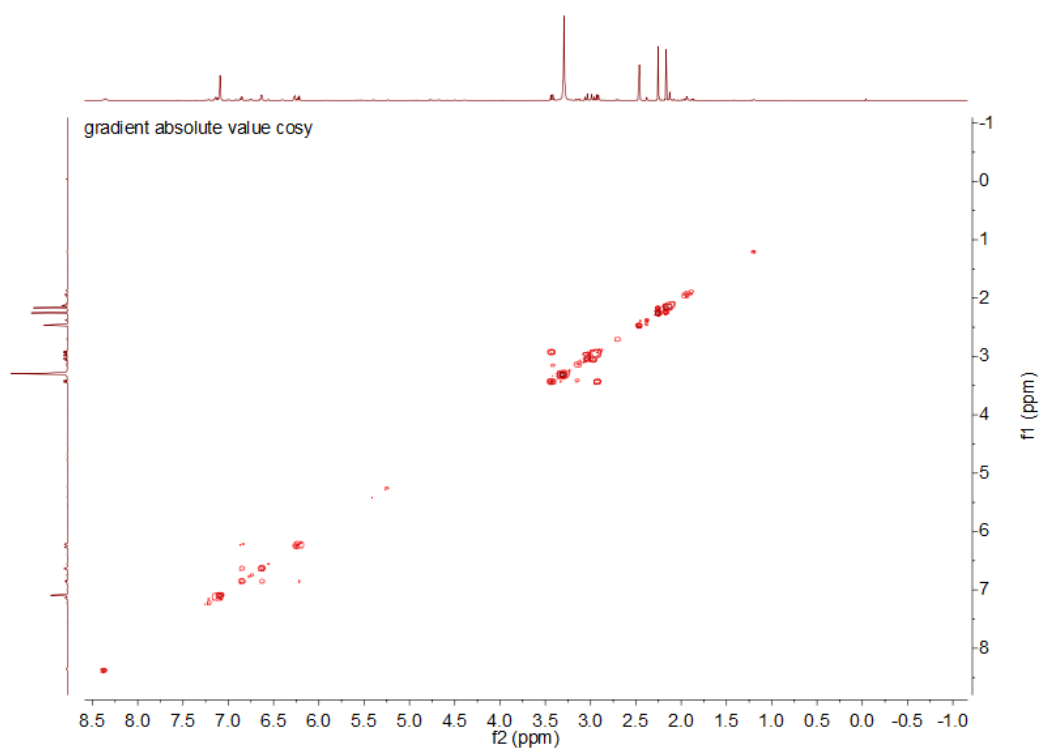

**Figure S24.**  $^1\text{H}$ - $^1\text{H}$  COSY (DMSO- $d_6$ ) spectrum of compound **3**

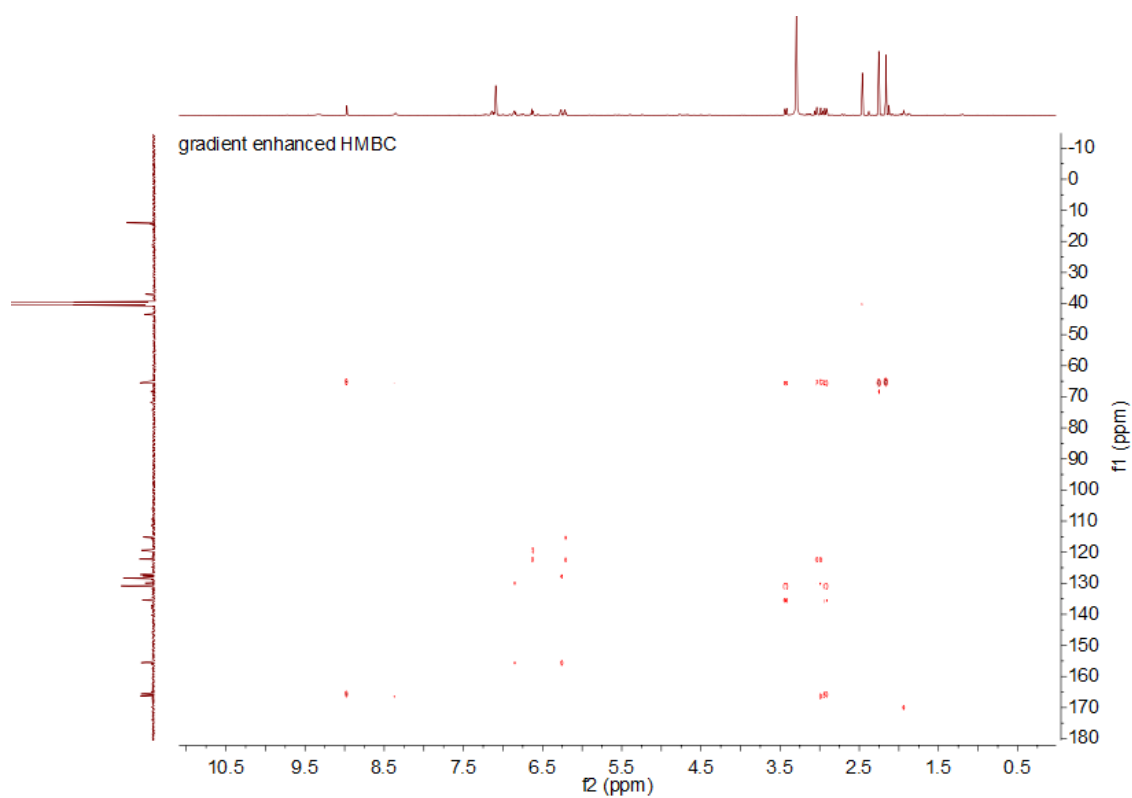

**Figure S25.** HMBC (DMSO- $d_6$ ) spectrum of compound **3**

20190912-RAD7-2-3-4\_190912085157 #108-110 RT: 1.57-1.59 AV: 3 SB: 25 0.26-0.65 NL: 5.92E6  
T: FTMS - p ESI Full ms [100.00-2000.00]

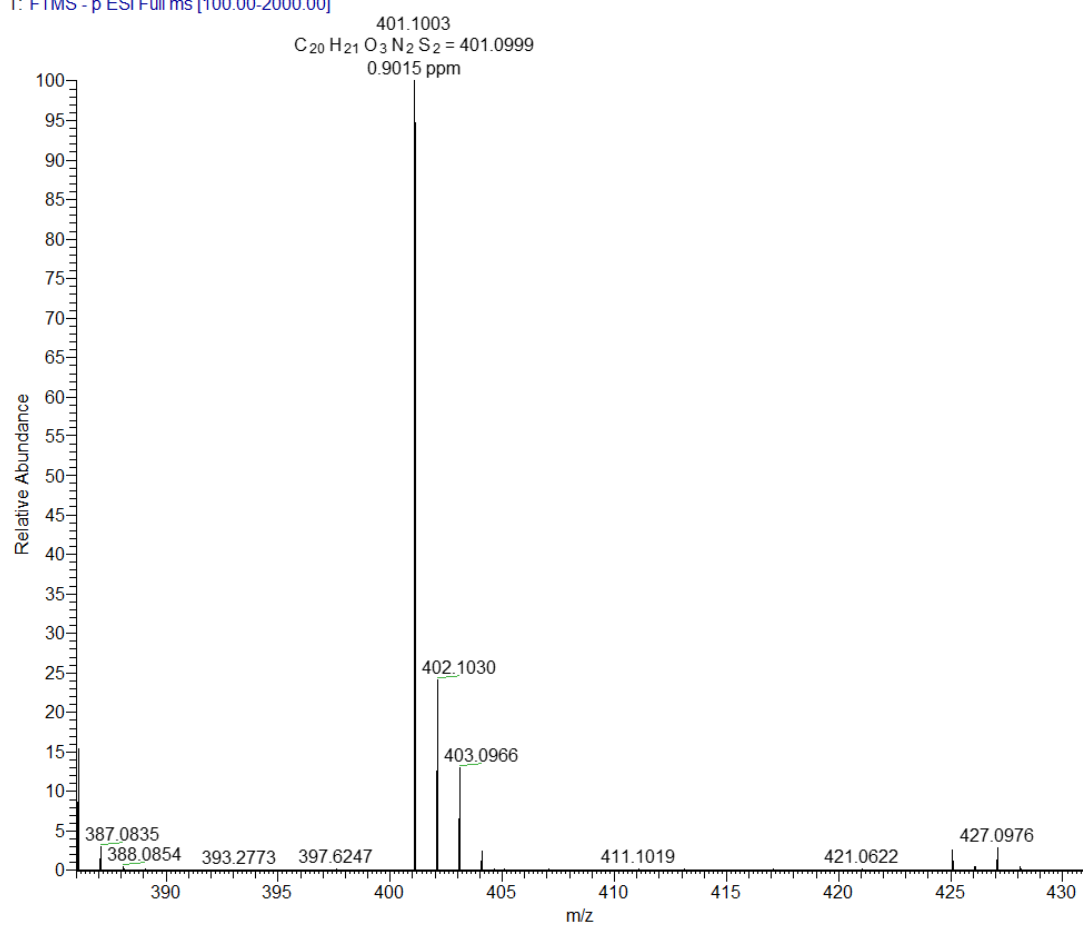



**Figure S26.** HRESIMS spectrum of compound **3**

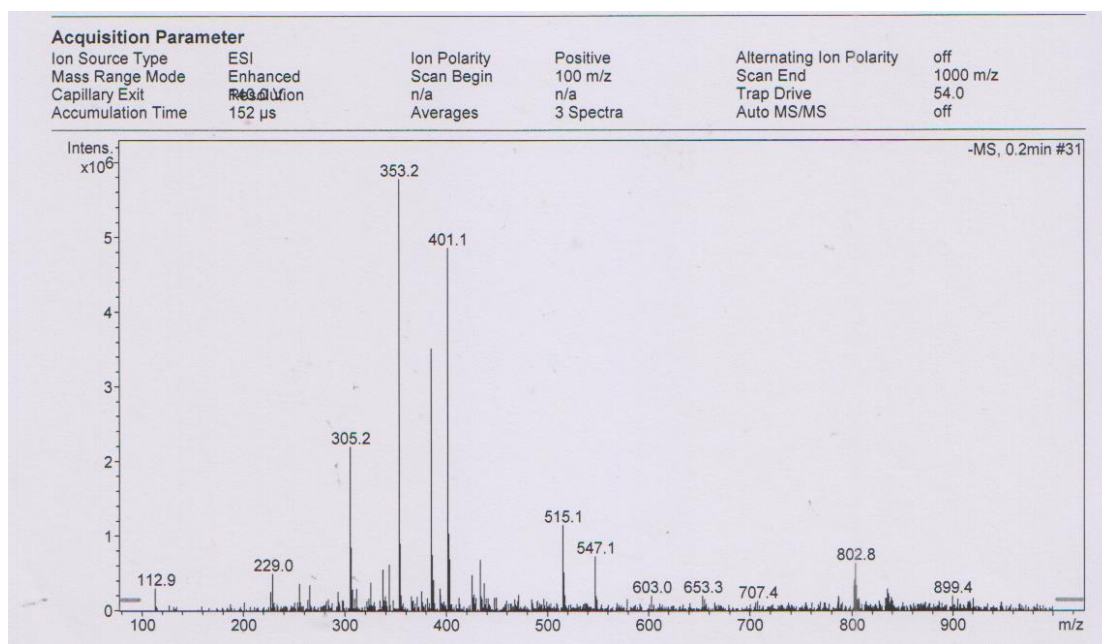

**Figure S27.** ESIMS spectrum of compound **3**

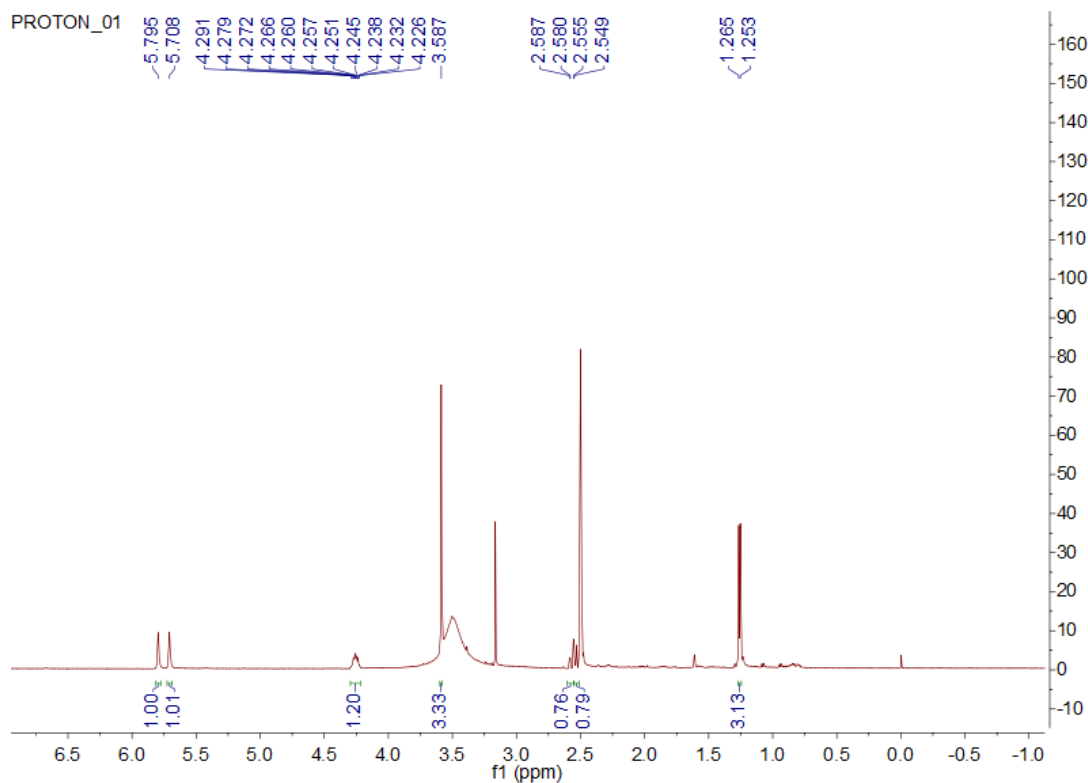

**Figure S28.**  $^1\text{H}$  NMR (500 MHz,  $\text{DMSO}-d_6$ ) spectrum of compound **8**

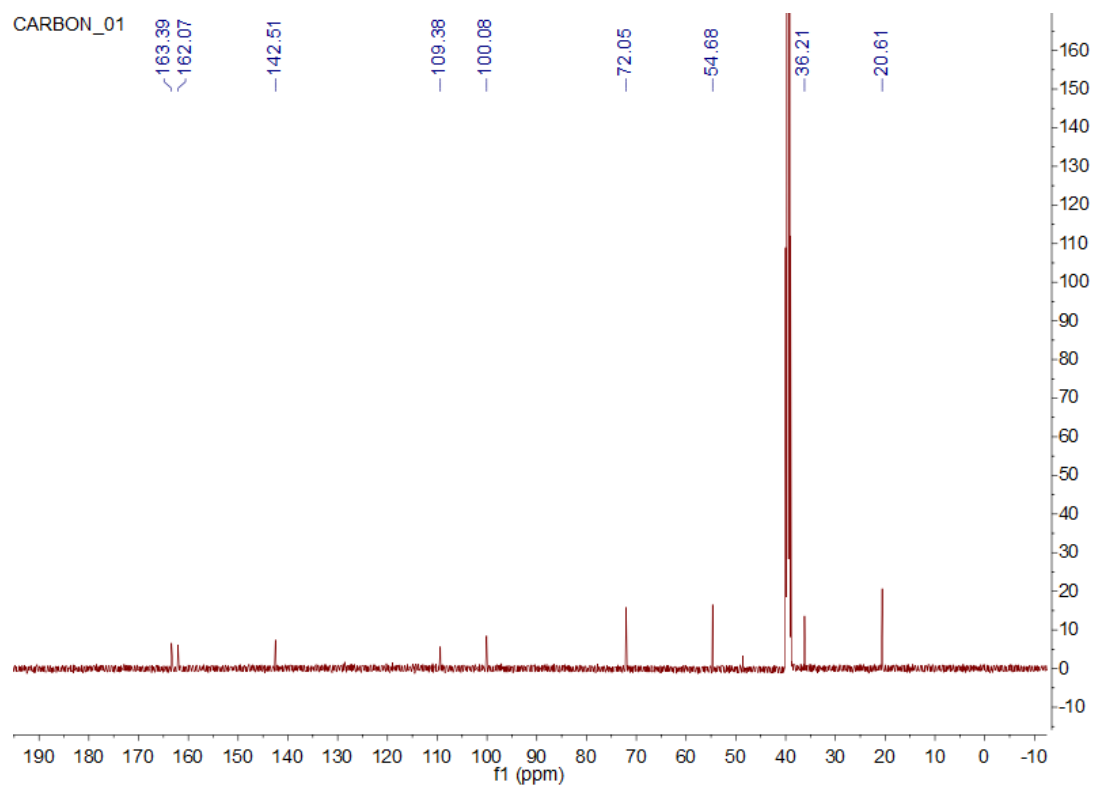

**Figure S29.**  $^{13}\text{C}$  NMR (125MHz,  $\text{DMSO}-d_6$ ) spectrum of compound **8**

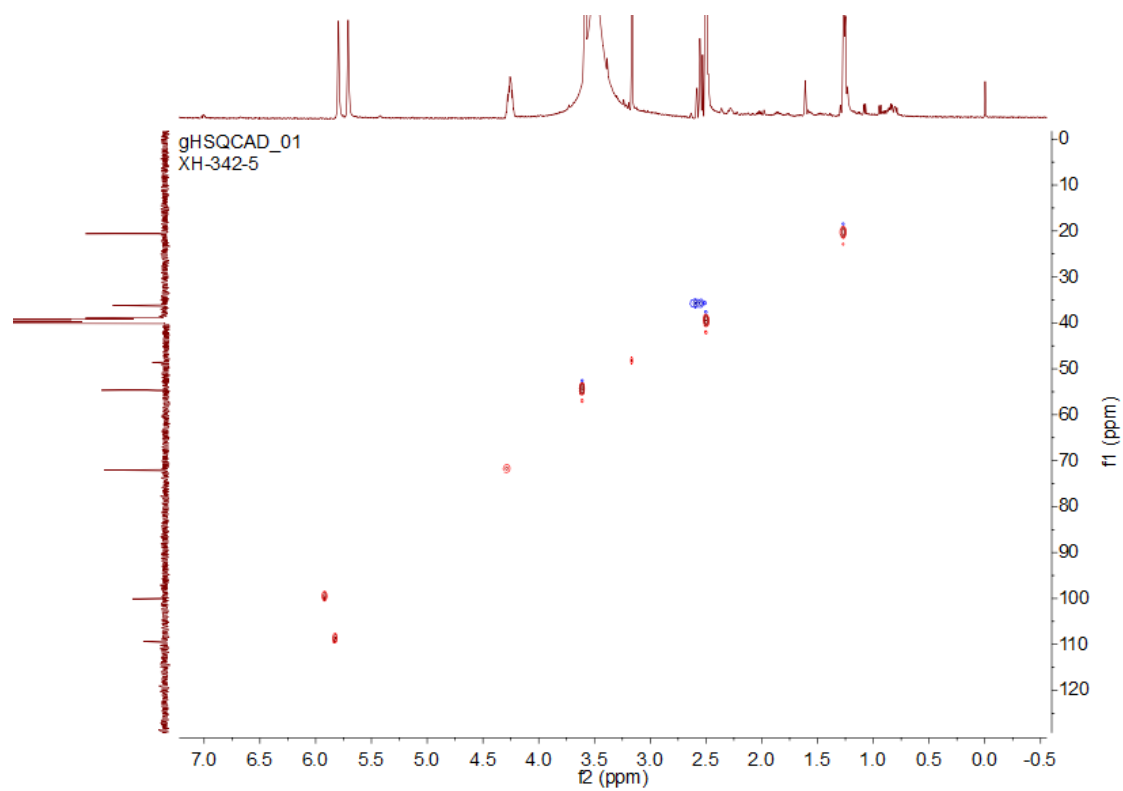

**Figure S30.** HSQC ( $\text{DMSO}-d_6$ ) spectrum of compound **8**

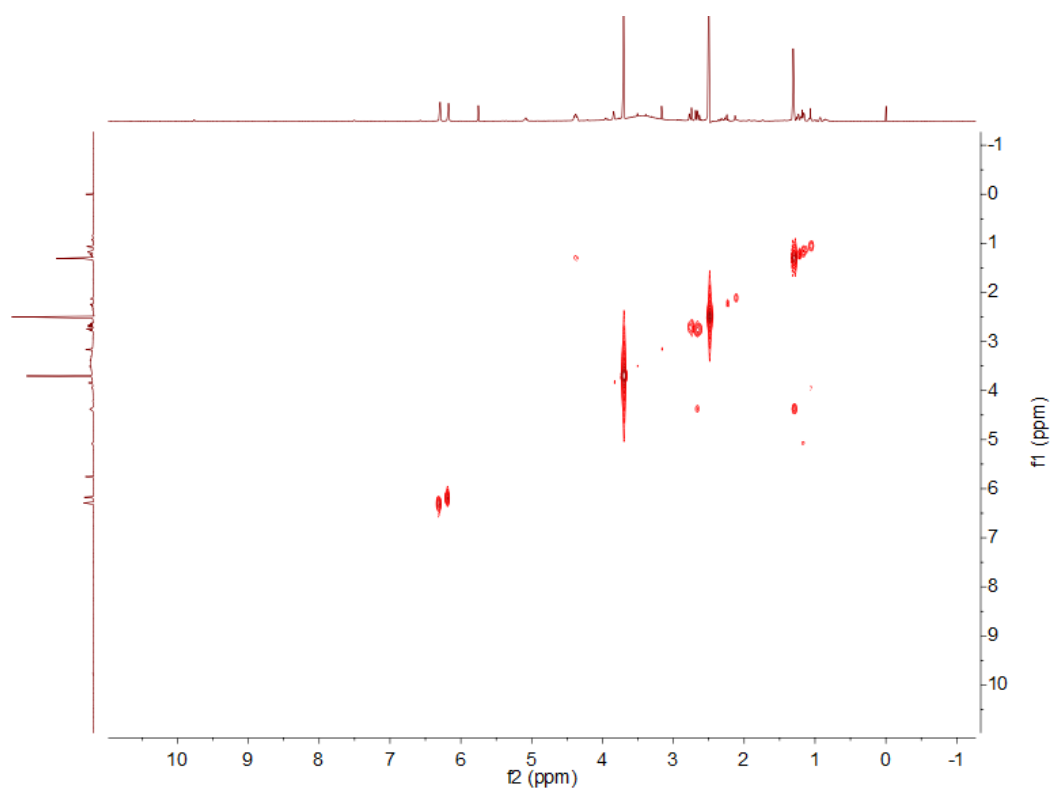

**Figure S31.**  $^1\text{H}$ - $^1\text{H}$  COSY (DMSO- $d_6$ ) spectrum of compound **8**

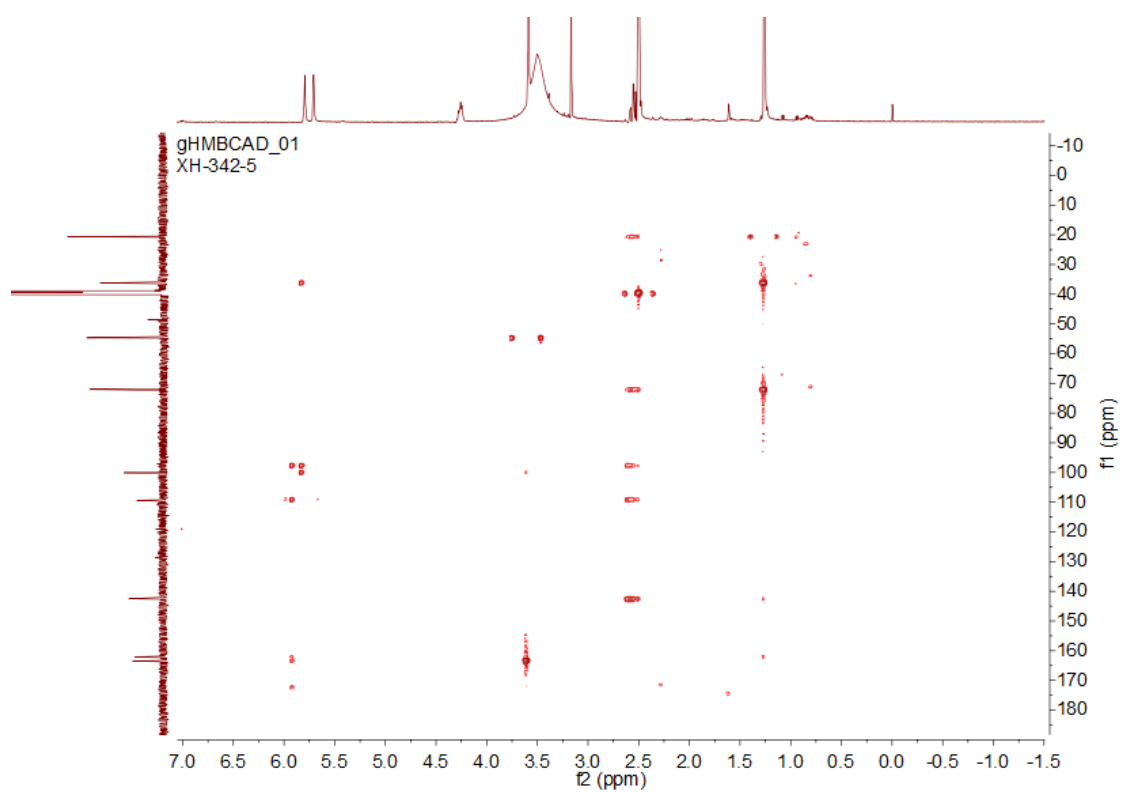

**Figure S32.** HMBC (DMSO- $d_6$ ) spectrum of compound **8**

20180704-XH-3425\_180704113343#42 RT: 0.34 AV: 1 NL: 2.08E7  
T: FTMS + p ESI Full ms [100.00-2000.00]

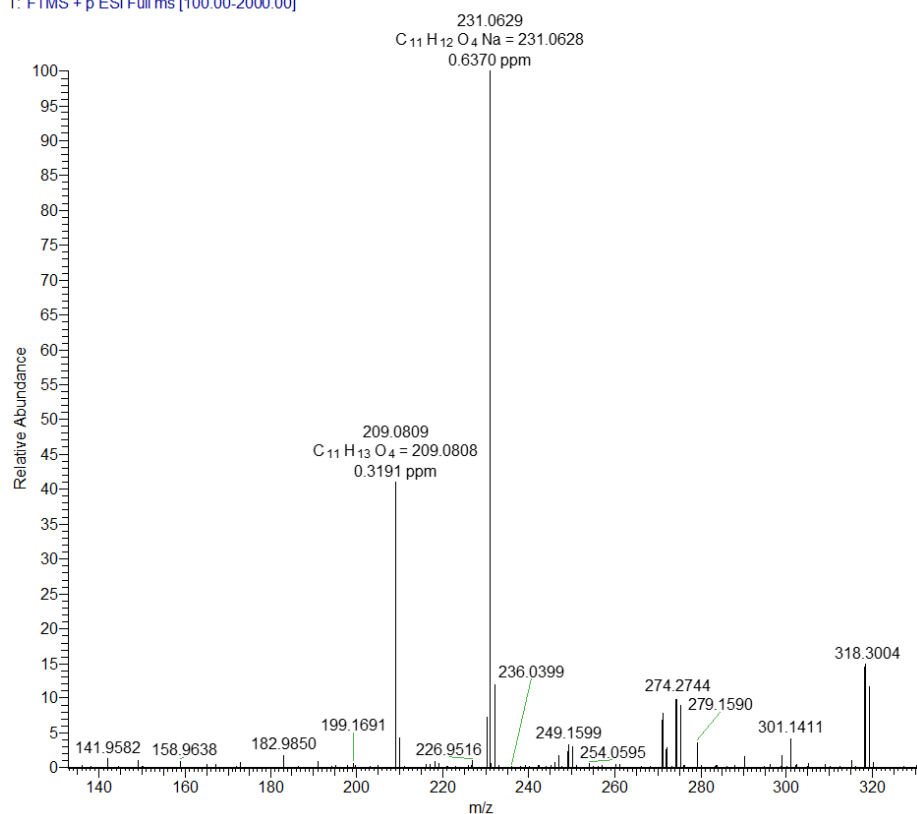

Figure S33. HRESIMS spectrum of compound **8**

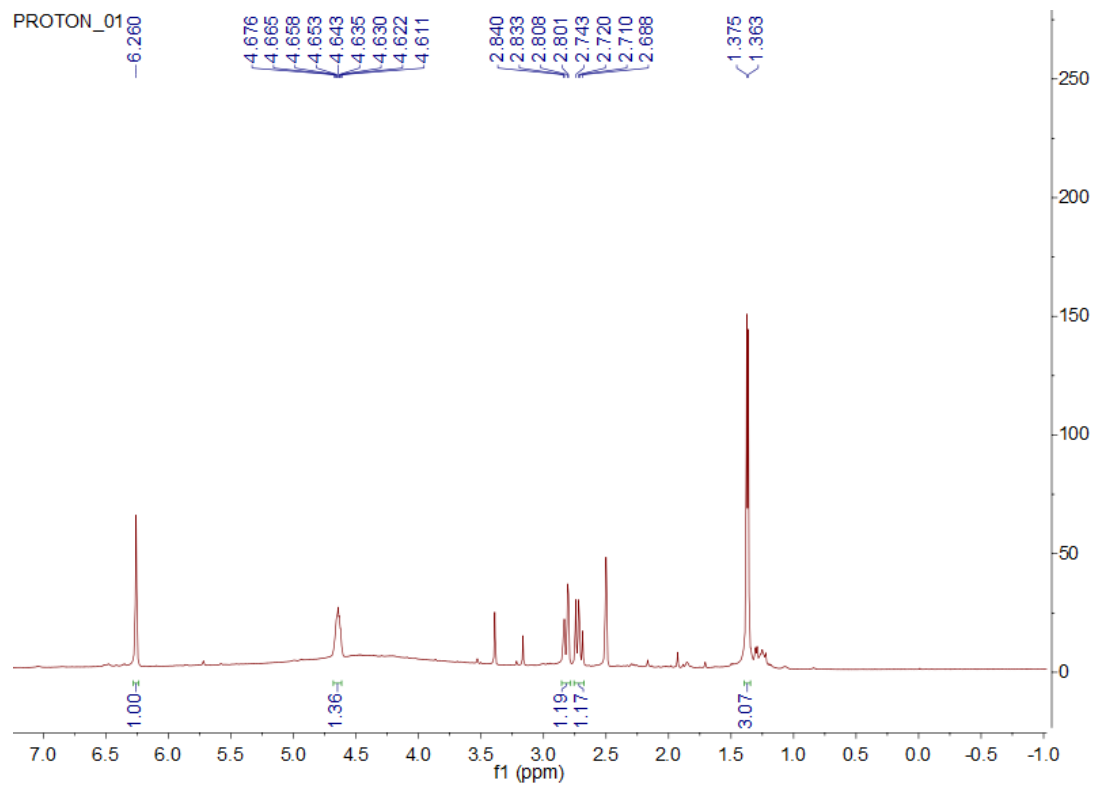

Figure S34. <sup>1</sup>H NMR (500 MHz, DMSO-*d*<sub>6</sub>) spectrum of compound **9**

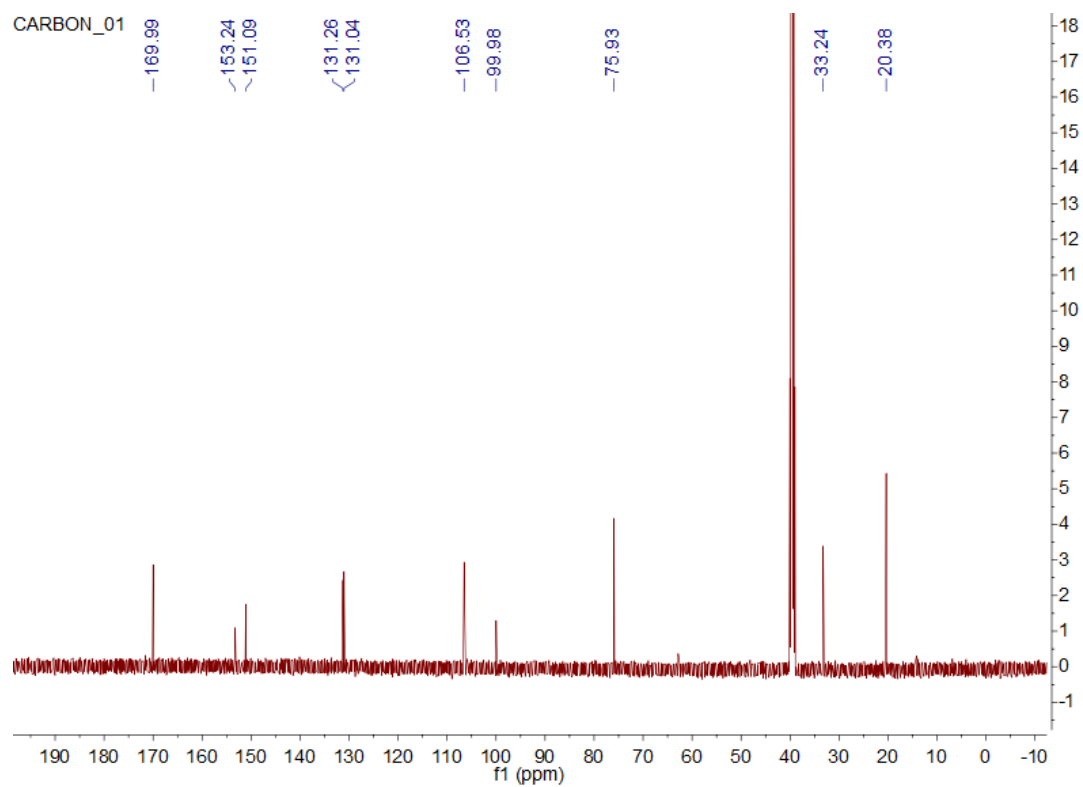

**Figure S35.**  $^{13}\text{C}$  NMR (125MHz,  $\text{DMSO}-d_6$ ) spectrum of compound **9**

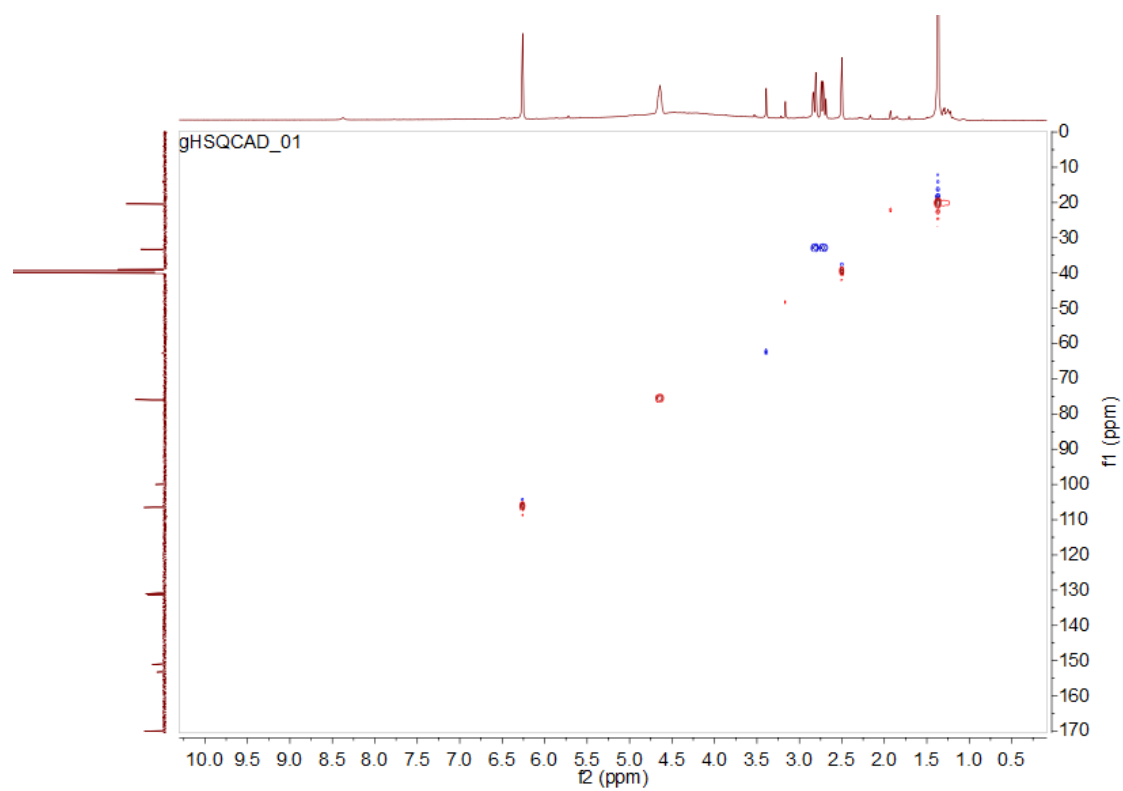

**Figure S36.** HSQC ( $\text{DMSO}-d_6$ ) spectrum of compound **9**

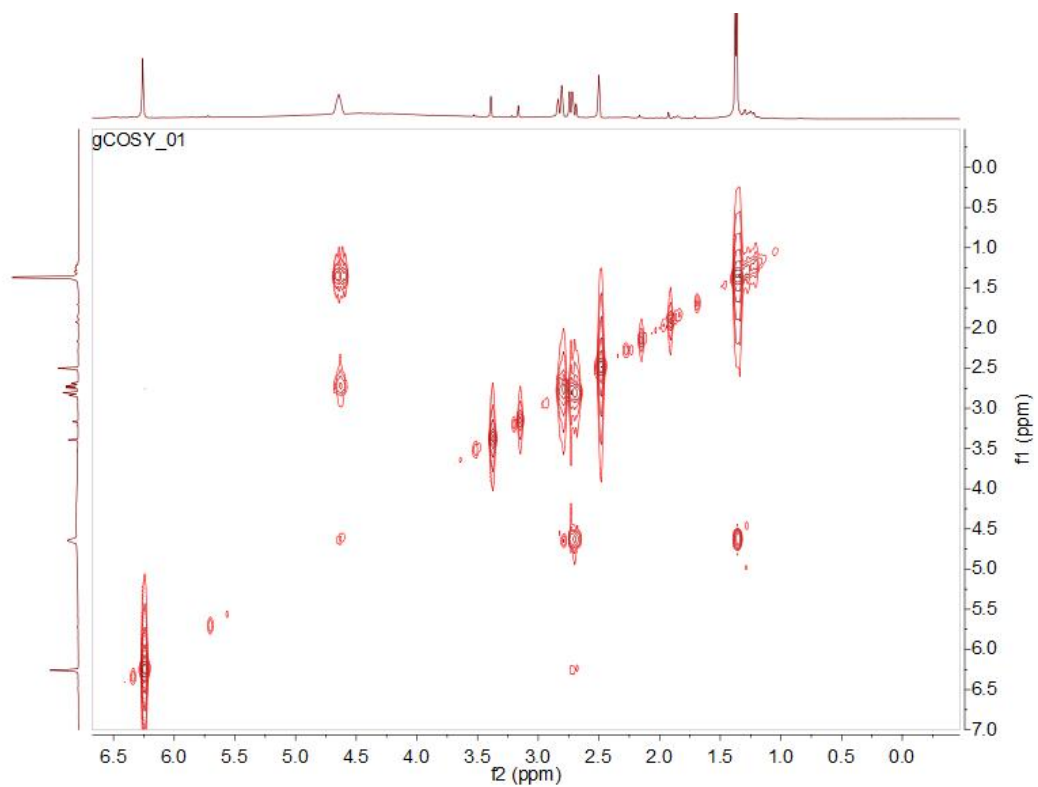

**Figure S37.**  $^1\text{H}$ - $^1\text{H}$  COSY (DMSO- $d_6$ ) spectrum of compound **9**

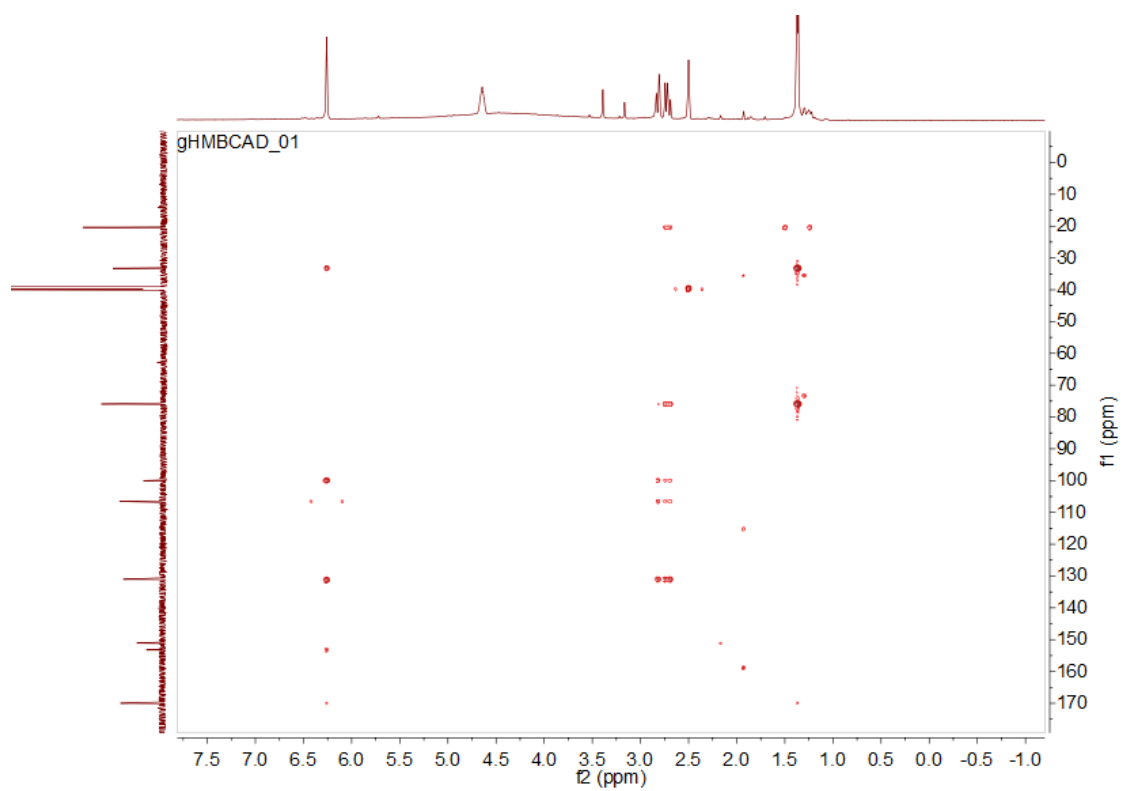

**Figure S38.** HMBC (DMSO- $d_6$ ) spectrum of compound **9**

201812045-XH-2253-1\_181205084117 #111-114 RT: 1.22-1.26 AV: 4 SB: 12 0.04-0.18 NL: 6.31E5  
T: FTMS - p ESI Full ms [150.00-1000.00]

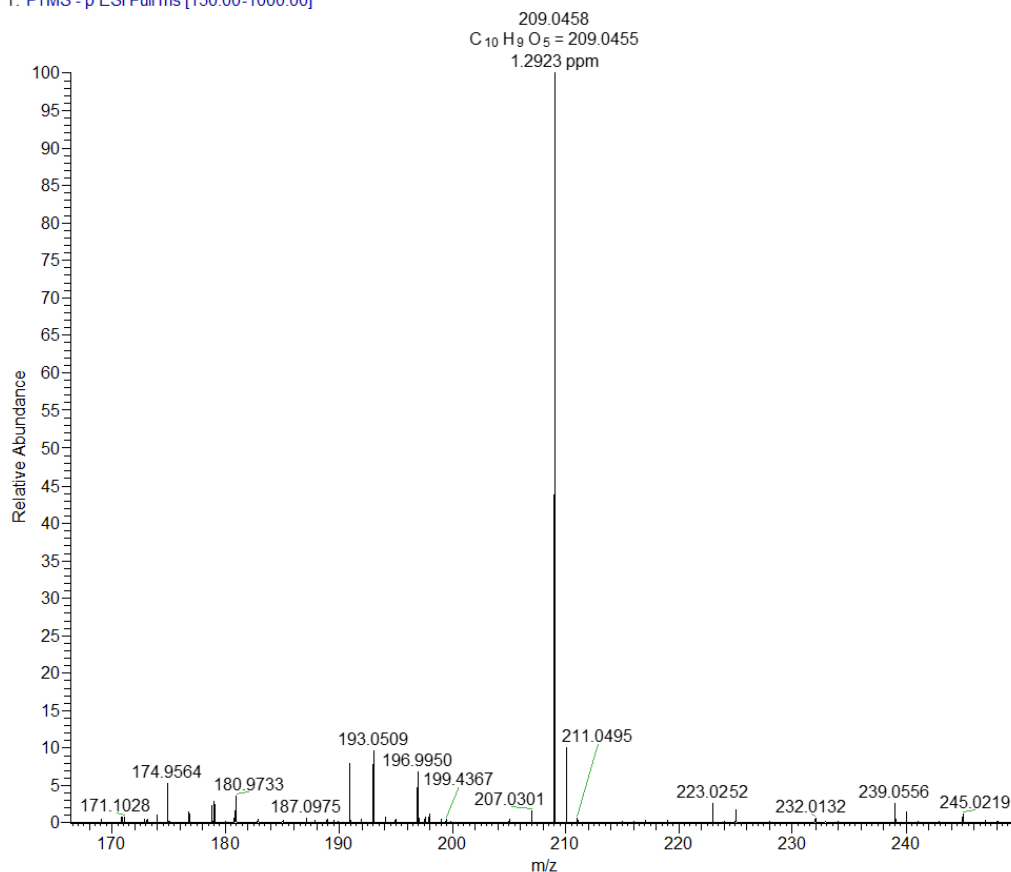

**Figure S39.** HRESIMS spectrum of compound **9**

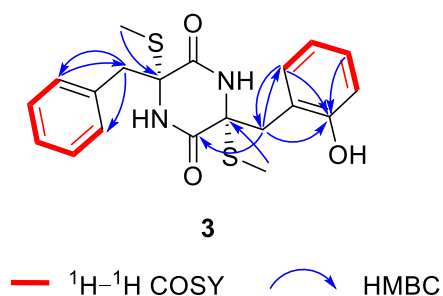

**Figure S40.** Key HMBC correlations of compound **3**

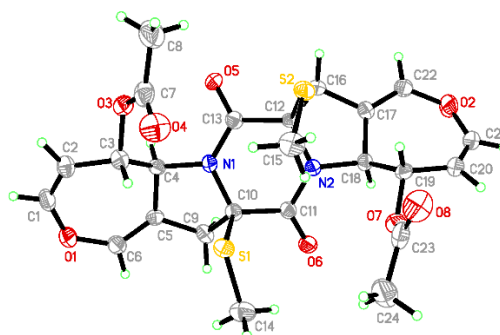

**Figure S41.** Crystal diagram of compound **6** (CCDC:1911625)

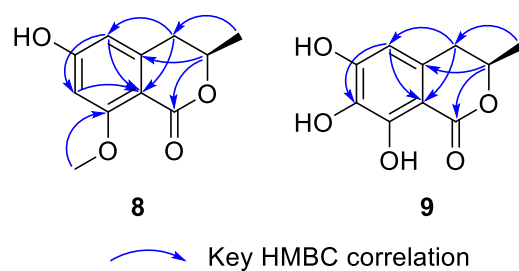

**Figure S42.** Key HMBC correlations of compounds **8** and **9**

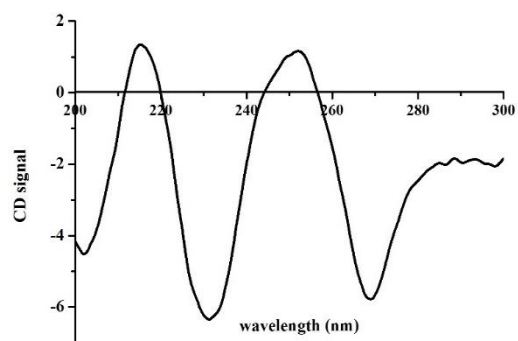

**Figure S43.** The CD spectrum of compound **8**

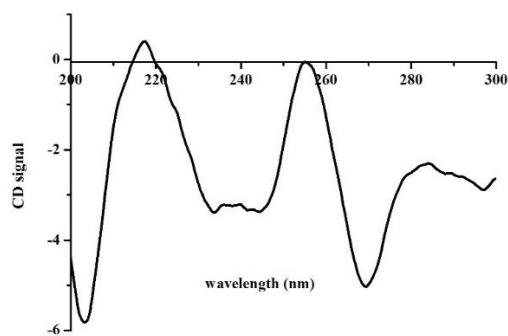

**Figure S44.** The CD spectrum of compound **9**
